# Supplementary material for: Tertiary amines as a C1 synthon: metal-free synthesis of quinolines and 2-substituted quinolinesvia[3+2+1] aerobic cyclization and C–N bond cleavage
Source: Royal Society of Chemistry journal article supplement (doi:10.1039/d2nj04119g), 2023-01-01

# Supporting Information For

## Tertiary amines as a C1 synthon: metal-free synthesis of quinolines and 2-substituted quinolines *via* [3+2+1] aerobic cyclization and C–N bond cleavage

Jing-Yuan Liu,<sup>a</sup> Zhen-Ying Wang,<sup>a</sup> Qiang Li,<sup>\*a</sup> Dacheng Li<sup>a</sup> and Jianmin Dou<sup>\*a</sup>

<sup>a</sup> Shandong Provincial Key Laboratory of Chemical Energy Storage and Novel Cell  
Technology, School of Chemistry and Chemical Engineering, Liaocheng University, Liaocheng  
252000, P. R. China.

*E-mail:* liqiang9@lcu.edu.cn; jmdou@lcu.edu.cn.

### Table of Contents page

---

|                                                                                                |         |
|------------------------------------------------------------------------------------------------|---------|
| 1. General.....                                                                                | S1      |
| 2. General procedure for the synthesis of <b>4</b> .....                                       | S1      |
| 3. Characterization data for compounds <b>4</b> .....                                          | S1-S12  |
| 4. References.....                                                                             | S12     |
| 5. <sup>1</sup> H, <sup>19</sup> F and <sup>13</sup> C NMR spectra of compounds <b>4</b> ..... | S13-S42 |

---

## 1. General

All other substrates and reagents were commercially available and used without further purification. The products were purified by flash column chromatography on silica gel (300-400 meshes).  $^1\text{H}$  spectra were recorded in  $\text{CDCl}_3$  on 500 MHz NMR spectrometers and resonances ( $\delta$ ) are given in parts per million relatives to tetramethylsilane. Data are reported as follows: chemical shift, multiplicity (s = singlet, d = doublet, t = triplet, dd = doublet of doublets, m = multiplet, etc.), coupling constants (Hz) and integration.  $^{13}\text{C}$  spectra were recorded in  $\text{CDCl}_3$  on 125 MHz NMR spectrometers and resonances ( $\delta$ ) are given in ppm.  $^{19}\text{F}$  spectra were recorded in  $\text{CDCl}_3$  on 470 MHz NMR spectrometers and resonances ( $\delta$ ) are given in ppm. High-resolution mass spectral (HRMS) were obtained on a Waters XEVO G2-XS QTOF mass spectrometer with ESI resource. All GC analyses were performed on Shimadzu GC 2014C. Compound 4-methoxy-2-(1-phenylvinyl)aniline **5a** and N-phenylmethanimine **6** were prepared according to the reported literature.<sup>[1]</sup>

## 2. General procedure for the synthesis of **4** (**4a** as an example)

An oven dried Schlenk tube of 10 mL equipped with a magnetic stir bar was charged with phenylacetylene **1a** (0.5 mmol), 4-methoxyaniline **2a** (1.0 mmol, 2.0 equiv.), TMEDA **3a** (1.0 mmol, 2.0 equiv.) and  $\text{I}_2$  (1.0 mmol),  $\text{TsOH}\cdot\text{H}_2\text{O}$  (1.0 equiv.) in TFE (1.0 mL), The mixture was stirred at 130 °C for 12 hours under an atmosphere of  $\text{O}_2$ . After the reaction finished, the reaction mixtures were quenched with saturation  $\text{Na}_2\text{S}_2\text{O}_3$  solution (20 mL), extracted with EtOAc (3 × 20 mL). The combined organic layers were washed with brine, dried over anhydrous  $\text{Na}_2\text{SO}_4$  and concentrated under reduced pressure. The crude product was purified by column chromatography on silica gel (Petroleum ether/EtOAc = 5:1) to afford the product **4a** as a yellow solid (82.2 mg, 70% yield).

## 3. Characterization data for compounds **4**

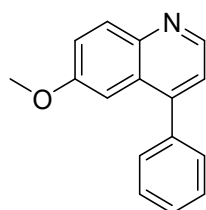

### 6-Methoxy-4-phenylquinoline (**4a**)<sup>[2]</sup>:

Obtained as a yellow solid (82.2 mg, 70% yield);  $^1\text{H-NMR}$  (500 MHz,  $\text{CDCl}_3$ )  $\delta$

(ppm) 8.79 (d,  $J = 4.4$  Hz, 1H), 8.07 (d,  $J = 9.2$  Hz, 1H), 7.55-7.45 (m, 5H), 7.38 (dd,  $J = 9.2, 2.8$  Hz, 1H), 7.27 (d,  $J = 4.4$  Hz, 1H), 7.19 (d,  $J = 2.7$  Hz, 1H), 3.78 (s, 3H).  $^{13}\text{C}$ -NMR (125 MHz,  $\text{CDCl}_3$ )  $\delta$  (ppm) 157.8, 147.5, 147.1, 144.8, 138.3, 131.2, 129.3, 128.6, 128.3, 127.7, 121.7, 121.6, 103.7, 55.4. HRMS (ESI)  $m/z$ :  $[\text{M}+\text{H}]^+$  calcd for  $\text{C}_{16}\text{H}_{14}\text{NO}$ : 236.1075, found: 236.1091.

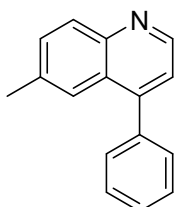

#### 6-Methyl-4-phenylquinoline (4b) [2]:

Obtained as a colorless liquid (85.5 mg, 78% yield);  $^1\text{H}$ -NMR (500 MHz,  $\text{CDCl}_3$ )  $\delta$  (ppm) 8.86 (d,  $J = 4.4$  Hz, 1H), 8.07 (d,  $J = 8.5$  Hz, 1H), 7.65 (s, 1H), 7.59-7.43 (m, 6H), 7.27 (d,  $J = 4.4$  Hz, 1H), 2.46 (s, 3H).  $^{13}\text{C}$ -NMR (125 MHz,  $\text{CDCl}_3$ )  $\delta$  (ppm) 149.0, 147.7, 147.3, 138.2, 136.5, 131.5, 129.54, 129.47, 128.5, 128.2, 126.7, 124.5, 121.4, 21.8. HRMS (ESI)  $m/z$ :  $[\text{M}+\text{H}]^+$  calcd for  $\text{C}_{16}\text{H}_{14}\text{N}$ : 220.1126, found: 220.1146.

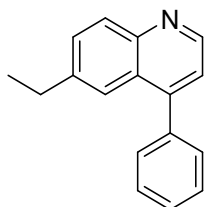

#### 6-Ethyl-4-phenylquinoline (4c) [3]:

Obtained as a brown liquid (62.9 mg, 54% yield);  $^1\text{H}$ -NMR (500 MHz,  $\text{CDCl}_3$ )  $\delta$  (ppm) 8.86 (d,  $J = 4.4$  Hz, 1H), 8.11 (d,  $J = 8.6$  Hz, 1H), 7.68 (s, 1H), 7.58 (dd,  $J = 8.7, 2.0$  Hz, 1H), 7.55-7.44 (m, 5H), 7.26 (d,  $J = 4.4$  Hz, 1H), 2.74 (q,  $J = 7.6$  Hz, 2H), 1.24 (t,  $J = 7.6$  Hz, 3H).  $^{13}\text{C}$ -NMR (125 MHz,  $\text{CDCl}_3$ )  $\delta$  (ppm) 149.0, 147.8, 147.4, 142.7, 138.2, 130.3, 129.6, 129.4, 128.4, 128.2, 126.6, 123.3, 121.3, 29.0, 15.4. HRMS (ESI)  $m/z$ :  $[\text{M}+\text{H}]^+$  calcd for  $\text{C}_{17}\text{H}_{16}\text{N}$ : 234.1282, found: 234.1279.

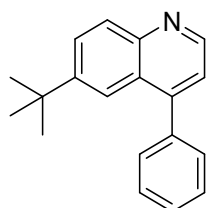

#### 6-(*tert*-Butyl)-4-phenylquinoline (4d) [2]:

Obtained as a colorless liquid (78.3 mg, 60% yield);  $^1\text{H-NMR}$  (500 MHz,  $\text{CDCl}_3$ )  $\delta$  (ppm) 8.88 (d,  $J = 4.4$  Hz, 1H), 8.12 (d,  $J = 8.9$  Hz, 1H), 7.88 (d,  $J = 2.2$  Hz, 1H), 7.82 (dd,  $J = 8.9, 2.2$  Hz, 1H), 7.63-7.41 (m, 5H), 7.29 (d,  $J = 4.4$  Hz, 1H), 1.33 (s, 9H).  $^{13}\text{C-NMR}$  (125 MHz,  $\text{CDCl}_3$ )  $\delta$  (ppm) 149.3, 149.25, 148.3, 147.2, 138.2, 129.5, 129.3, 128.5, 128.3, 128.1, 126.2, 121.3, 120.6, 35.0, 31.1. HRMS (ESI)  $m/z$ :  $[\text{M}+\text{H}]^+$  calcd for  $\text{C}_{19}\text{H}_{20}\text{N}$ : 262.1595, found: 262.1593.

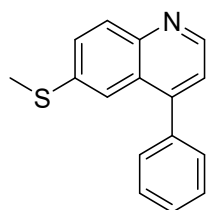

#### 6-(Methylthio)-4-phenylquinoline (4e) [4]:

Obtained as a white solid (54.0 mg, 43% yield);  $^1\text{H-NMR}$  (500 MHz,  $\text{CDCl}_3$ )  $\delta$  (ppm) 8.85 (d,  $J = 4.4$  Hz, 1H), 8.06 (d,  $J = 8.8$  Hz, 1H), 7.67 (d,  $J = 2.2$  Hz, 1H), 7.61 (dd,  $J = 8.9, 2.1$  Hz, 1H), 7.56-7.45 (m, 6H), 7.30 (d,  $J = 4.4$  Hz, 1H), 2.45 (s, 3H).  $^{13}\text{C-NMR}$  (125 MHz,  $\text{CDCl}_3$ )  $\delta$  (ppm) 149.1, 147.1, 146.9, 137.8, 137.5, 130.1, 129.4, 128.7, 128.6, 128.5, 127.1, 121.9, 121.0, 15.6. HRMS (ESI)  $m/z$ :  $[\text{M}+\text{H}]^+$  calcd for  $\text{C}_{16}\text{H}_{14}\text{NS}$ : 252.0847, found: 252.0850.

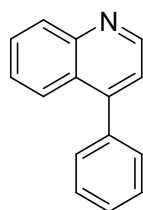

#### 4-Phenylquinoline (4f) [4]:

Obtained as a yellow liquid (49.2 mg, 48% yield);  $^1\text{H-NMR}$  (500 MHz,  $\text{CDCl}_3$ )  $\delta$  (ppm) 8.93 (d,  $J = 4.4$  Hz, 1H), 8.18 (d,  $J = 8.4$  Hz, 1H), 7.91 (d,  $J = 8.5$  Hz, 1H), 7.79-7.63 (m, 1H), 7.59-7.40 (m, 6H), 7.31 (d,  $J = 4.4$  Hz, 1H).  $^{13}\text{C-NMR}$  (125 MHz,  $\text{CDCl}_3$ )  $\delta$  (ppm) 149.9, 148.6, 148.4, 137.9, 129.8, 129.4, 129.2, 128.5, 128.3, 126.7, 126.5, 125.8, 121.2. HRMS (ESI)  $m/z$ :  $[\text{M}+\text{H}]^+$  calcd for  $\text{C}_{15}\text{H}_{12}\text{N}$ : 206.0969, found: 206.0969.

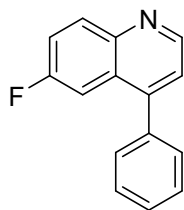

**6-Fluoro-4-phenylquinoline (4g)** <sup>[4]</sup>:

Obtained as a white solid (100.4 mg, 90% yield); <sup>1</sup>H-NMR (500 MHz, CDCl<sub>3</sub>)  $\delta$  (ppm) 8.88 (d,  $J$  = 4.4 Hz, 1H), 8.16 (dd,  $J$  = 9.2, 5.6 Hz, 1H), 7.61-7.39 (m, 7H), 7.30 (d,  $J$  = 4.4 Hz, 1H). <sup>13</sup>C-NMR (125 MHz, CDCl<sub>3</sub>)  $\delta$  (ppm) 160.5 (d,  $J$  = 247.7 Hz), 149.1 (d,  $J$  = 2.5 Hz), 147.8 (d,  $J$  = 5.5 Hz), 145.7, 137.4, 132.2 (d,  $J$  = 9.2 Hz), 129.2, 128.6, 128.5, 127.4 (d,  $J$  = 9.6 Hz), 121.7, 119.4 (d,  $J$  = 25.8 Hz), 109.0 (d,  $J$  = 23.1 Hz). <sup>19</sup>F NMR (470 MHz, CDCl<sub>3</sub>)  $\delta$  (ppm) -112.5. HRMS (ESI)  $m/z$ : [M+H]<sup>+</sup> calcd for C<sub>15</sub>H<sub>11</sub>FN: 224.0875, found: 224.0879.

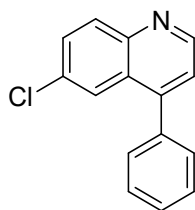

**6-Chloro-4-phenylquinoline (4h)** <sup>[4]</sup>:

Obtained as a white solid (102.8 mg, 86% yield); <sup>1</sup>H-NMR (500 MHz, CDCl<sub>3</sub>)  $\delta$  (ppm) 8.92 (d,  $J$  = 4.4 Hz, 1H), 8.11 (d,  $J$  = 9.0 Hz, 1H), 7.88 (d,  $J$  = 2.4 Hz, 1H), 7.66 (dd,  $J$  = 9.0, 2.3 Hz, 1H), 7.62-7.41 (m, 5H), 7.35 (d,  $J$  = 4.4 Hz, 1H). <sup>13</sup>C-NMR (125 MHz, CDCl<sub>3</sub>)  $\delta$  (ppm) 150.1, 147.8, 147.1, 137.3, 132.6, 131.5, 130.3, 129.4, 128.8, 128.7, 127.5, 124.7, 122.1. HRMS (ESI)  $m/z$ : [M+H]<sup>+</sup> calcd for C<sub>15</sub>H<sub>11</sub>ClN: 240.0580, found: 240.0586.

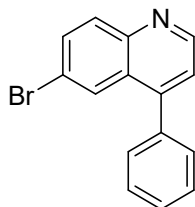

**6-Bromo-4-phenylquinoline (4i)** <sup>[4]</sup>:

Obtained as a white solid (63.7 mg, 45% yield); <sup>1</sup>H-NMR (500 MHz, CDCl<sub>3</sub>)  $\delta$  (ppm) 8.95 (d,  $J$  = 4.4 Hz, 1H), 8.06-8.03 (m, 2H), 7.80 (dd,  $J$  = 9.0, 2.2 Hz, 1H), 7.61-7.44 (m,

5H), 7.36 (d,  $J = 4.4$  Hz, 1H).  $^{13}\text{C}$ -NMR (125 MHz,  $\text{CDCl}_3$ )  $\delta$  (ppm) 150.30, 147.7, 147.3, 137.3, 132.8, 131.6, 129.4, 128.8, 128.7, 127.98, 127.96, 122.0, 120.9. HRMS (ESI)  $m/z$ :  $[\text{M}+\text{H}]^+$  calcd for  $\text{C}_{15}\text{H}_{11}\text{BrN}$ : 284.0075, found: 284.0080.

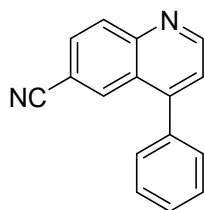

#### 4-Phenylquinoline-6-carbonitrile (4j) <sup>[5]</sup>:

Obtained as a yellow solid (43.7 mg, 38% yield);  $^1\text{H}$ -NMR (500 MHz,  $\text{CDCl}_3$ )  $\delta$  (ppm) 9.07 (d,  $J = 4.5$  Hz, 1H), 8.33 (d,  $J = 1.8$  Hz, 1H), 8.26 (d,  $J = 8.7$  Hz, 1H), 7.87 (dd,  $J = 8.8, 1.9$  Hz, 1H), 7.69-7.53 (m, 3H), 7.53-7.43 (m, 3H).  $^{13}\text{C}$ -NMR (125 MHz,  $\text{CDCl}_3$ )  $\delta$  (ppm) 152.7, 149.6, 149.1, 136.4, 132.6, 131.4, 129.9, 129.4, 129.2, 129.0, 126.3, 122.7, 118.7, 110.4. HRMS (ESI)  $m/z$ :  $[\text{M}+\text{H}]^+$  calcd for  $\text{C}_{16}\text{H}_{11}\text{N}_2$ : 231.0922, found: 231.0931.

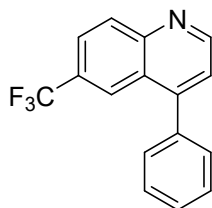

#### 4-Phenyl-6-(trifluoromethyl) quinoline (4k) <sup>[4]</sup>:

Obtained as a yellow liquid (46.4 mg, 34% yield);  $^1\text{H}$ -NMR (500 MHz,  $\text{CDCl}_3$ )  $\delta$  (ppm) 9.05 (d,  $J = 4.4$  Hz, 1H), 8.29 (d,  $J = 8.8$  Hz, 1H), 8.25 (s, 1H), 7.90 (dd,  $J = 8.8, 2.1$  Hz, 1H), 7.61-7.48 (m, 5H), 7.44 (d,  $J = 4.4$  Hz, 1H).  $^{13}\text{C}$ -NMR (125 MHz,  $\text{CDCl}_3$ )  $\delta$  (ppm) 152.0, 149.7, 149.5, 137.0, 131.2, 129.4, 129.0, 128.9, 128.5 (q,  $J = 32.3$  Hz), 125.9, 125.0 (q,  $J = 2.9$  Hz), 124.02 (q,  $J = 270.8$  Hz), 123.95 (q,  $J = 4.6$  Hz), 122.4.  $^{19}\text{F}$  NMR (470 MHz,  $\text{CDCl}_3$ )  $\delta$  (ppm) -62.3. HRMS (ESI)  $m/z$ :  $[\text{M}+\text{H}]^+$  calcd for  $\text{C}_{16}\text{H}_{11}\text{F}_3\text{N}$ : 274.0843, found: 274.0845.

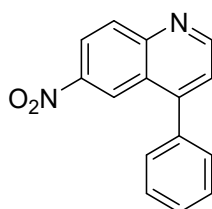

#### 6-Nitro-4-phenylquinoline (4l) <sup>[6]</sup>:

Obtained as a yellow solid (32.5 mg, 26% yield);  $^1\text{H}$ -NMR (500 MHz,  $\text{CDCl}_3$ )  $\delta$  (ppm) 9.11 (d,  $J = 4.4$  Hz, 1H), 8.89 (d,  $J = 2.5$  Hz, 1H), 8.49 (dd,  $J = 9.2, 2.5$  Hz, 1H),

8.30 (d,  $J = 9.3$  Hz, 1H), 7.65-7.57 (m, 3H), 7.54-7.50 (m, 3H).  $^{13}\text{C}$ -NMR (125 MHz,  $\text{CDCl}_3$ )  $\delta$  (ppm) 153.2, 150.8, 150.7, 145.8, 136.4, 131.8, 129.5, 129.4, 129.1, 125.9, 123.1, 122.9, 122.8. HRMS (ESI)  $m/z$ :  $[\text{M}+\text{H}]^+$  calcd for  $\text{C}_{15}\text{H}_{11}\text{N}_2\text{O}_2$ : 251.0820, found: 251.0821.

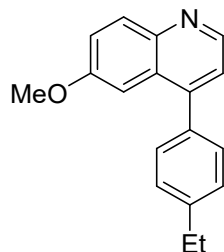

#### 4-(4-Ethylphenyl)-6-methoxyquinoline (4m):

Obtained as a yellow solid (84.2 mg, 64% yield), m.p.: 51-52 °C;  $^1\text{H}$ -NMR (500 MHz,  $\text{CDCl}_3$ )  $\delta$  (ppm) 8.76 (d,  $J = 4.4$  Hz, 1H), 8.06 (d,  $J = 9.2$  Hz, 1H), 7.45-7.39 (m, 2H), 7.38-7.31 (m, 3H), 7.26-7.21 (m, 2H), 3.76 (s, 3H), 2.74 (q,  $J = 7.6$  Hz, 2H), 1.31 (t,  $J = 7.6$  Hz, 3H).  $^{13}\text{C}$ -NMR (125 MHz,  $\text{CDCl}_3$ )  $\delta$  (ppm) 157.6, 147.4, 147.0, 144.7, 144.3, 135.5, 131.1, 129.1, 128.0, 127.6, 121.50, 121.48, 103.7, 55.2, 28.5, 15.3. HRMS (ESI)  $m/z$ :  $[\text{M}+\text{H}]^+$  calcd for  $\text{C}_{18}\text{H}_{18}\text{NO}$ : 264.1388, found: 264.1384.

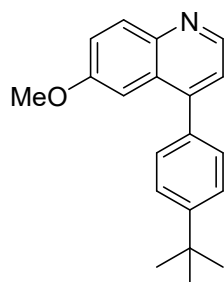

#### 4-(4-(*tert*-Butyl)phenyl)-6-methoxyquinoline (4n)<sup>[7]</sup>:

Obtained as a yellow liquid (101.9 mg, 70% yield);  $^1\text{H}$ -NMR (500 MHz,  $\text{CDCl}_3$ )  $\delta$  (ppm) 8.78 (d,  $J = 4.5$  Hz, 1H), 8.07 (d,  $J = 9.2$  Hz, 1H), 7.61-7.52 (m, 2H), 7.50-7.44 (m, 2H), 7.38 (dd,  $J = 9.2, 2.9$  Hz, 1H), 7.28 (m, 2H), 3.81 (s, 3H), 1.41 (s, 9H).  $^{13}\text{C}$ -NMR (125 MHz,  $\text{CDCl}_3$ )  $\delta$  (ppm) 157.8, 151.4, 147.6, 147.0, 144.8, 135.3, 131.3, 129.0, 127.7, 125.6, 121.7, 121.5, 104.3, 55.5, 34.7, 31.3. HRMS (ESI)  $m/z$ :  $[\text{M}+\text{H}]^+$  calcd for  $\text{C}_{20}\text{H}_{22}\text{NO}$ : 292.1701, found: 292.1705.

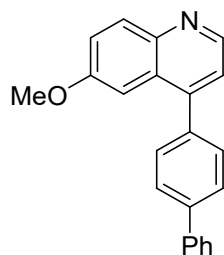

#### 4-([1,1'-biphenyl]-4-yl)-6-Methoxyquinoline (4o):

Obtained as a white solid (101.1 mg, 65% yield), m.p.: 163-164 °C; <sup>1</sup>H-NMR (500 MHz, CDCl<sub>3</sub>) δ (ppm) 8.80 (d, *J* = 4.4 Hz, 1H), 8.09 (d, *J* = 9.2 Hz, 1H), 7.76 (d, *J* = 7.8 Hz, 2H), 7.69 (d, *J* = 7.6 Hz, 2H), 7.59 (d, *J* = 7.9 Hz, 2H), 7.48 (t, *J* = 7.6 Hz, 2H), 7.42-7.36 (m, 2H), 7.31 (d, *J* = 4.4 Hz, 1H), 7.27 (d, *J* = 2.8 Hz, 1H), 3.79 (s, 3H). <sup>13</sup>C-NMR (125 MHz, CDCl<sub>3</sub>) δ (ppm) 157.9, 147.5, 146.6, 144.9, 141.1, 140.3, 137.2, 131.3, 129.7, 128.9, 127.62, 127.60, 127.3, 127.0, 121.7, 121.6, 103.7, 55.4. HRMS (ESI) *m/z*: [M+H]<sup>+</sup> calcd for C<sub>22</sub>H<sub>18</sub>NO: 312.1388, found: 312.1395.

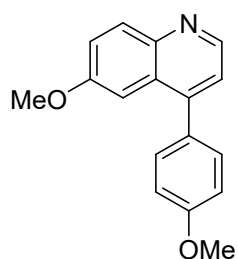

#### 6-Methoxy-4-(4-methoxyphenyl) quinoline (4p) [8]:

Obtained as a yellow liquid (37.1 mg, 28% yield); <sup>1</sup>H-NMR (500 MHz, CDCl<sub>3</sub>) δ (ppm) 8.77 (d, *J* = 4.4 Hz, 1H), 8.06 (d, *J* = 9.1 Hz, 1H), 7.51-7.41 (m, 2H), 7.37 (dd, *J* = 9.2, 2.8 Hz, 1H), 7.30-7.21 (m, 2H), 7.14-6.99 (m, 2H), 3.90 (s, 3H), 3.80 (s, 3H). <sup>13</sup>C-NMR (125 MHz, CDCl<sub>3</sub>) δ (ppm) 159.7, 157.8, 147.5, 146.8, 144.8, 131.2, 130.6, 130.5, 127.8, 121.64, 121.58, 114.1, 103.7, 55.4, 55.3. HRMS (ESI) *m/z*: [M+H]<sup>+</sup> calcd for C<sub>17</sub>H<sub>16</sub>NO<sub>2</sub>: 266.1181, found: 266.1194.

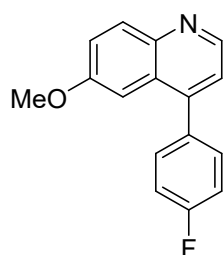

#### 4-(4-Fluorophenyl)-6-methoxyquinoline (4q) [7]:

Obtained as a white solid (97.4 mg, 77% yield); <sup>1</sup>H-NMR (500 MHz, CDCl<sub>3</sub>) δ (ppm) 8.78 (d, *J* = 4.4 Hz, 1H), 8.07 (d, *J* = 9.1 Hz, 1H), 7.47 (dd, *J* = 8.5, 5.5 Hz, 2H), 7.38 (dd, *J* = 9.3, 2.8 Hz, 1H), 7.26-7.17 (m, 3H), 7.11 (d, *J* = 2.9 Hz, 1H), 3.78 (s, 3H). <sup>13</sup>C-NMR (125 MHz, CDCl<sub>3</sub>) δ (ppm) 163.7, 161.8, 157.9, 147.5, 145.9, 144.8, 134.3 (d, *J* = 3.6 Hz), 131.4, 131.0 (d, *J* = 8.2 Hz), 127.6, 121.7 (d, *J* = 11.7 Hz), 115.7 (d, *J* = 21.6 Hz), 103.4, 55.4. <sup>19</sup>F NMR (470 MHz, CDCl<sub>3</sub>) δ (ppm) -113.3. HRMS (ESI) *m/z*: [M+H]<sup>+</sup>



calcd for C<sub>16</sub>H<sub>13</sub>FNO: 254.0981, found: 254.0989.

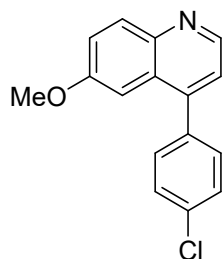

#### 4-(4-Chlorophenyl)-6-methoxyquinoline (4r)<sup>[7]</sup>:

Obtained as a white solid (103.6 mg, 77% yield); <sup>1</sup>H-NMR (500 MHz, CDCl<sub>3</sub>) δ (ppm) 8.76 (d, *J* = 4.4 Hz, 1H), 8.06 (d, *J* = 9.1 Hz, 1H), 7.48 (dd, *J* = 8.4, 1.6 Hz, 2H), 7.45-7.39 (m, 2H), 7.36 (dd, *J* = 9.2, 2.8 Hz, 1H), 7.20 (d, *J* = 4.4 Hz, 1H), 7.09 (d, *J* = 2.8 Hz, 1H), 3.76 (s, 3H). <sup>13</sup>C-NMR (125 MHz, CDCl<sub>3</sub>) δ (ppm) 157.9, 147.3, 145.5, 144.7, 136.6, 134.3, 131.2, 130.4, 128.8, 127.2, 121.7, 121.4, 103.1, 55.3. HRMS (ESI) *m/z*: [M+H]<sup>+</sup> calcd for C<sub>16</sub>H<sub>13</sub>ClNO: 270.0685, found: 270.0689.

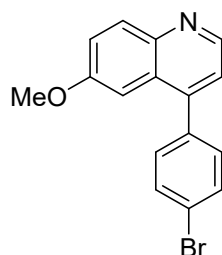

#### 4-(4-Bromophenyl)-6-methoxyquinoline (4s)<sup>[7]</sup>:

Obtained as a white solid (115.8 mg, 74% yield); <sup>1</sup>H-NMR (500 MHz, CDCl<sub>3</sub>) δ (ppm) 8.66 (d, *J* = 4.4 Hz, 1H), 7.95 (d, *J* = 9.2 Hz, 1H), 7.53 (d, *J* = 8.4 Hz, 2H), 7.32-7.19 (m, 3H), 7.10 (d, *J* = 4.3 Hz, 1H), 6.98 (d, *J* = 2.8 Hz, 1H), 3.66 (s, 3H). <sup>13</sup>C-NMR (125 MHz, CDCl<sub>3</sub>) δ (ppm) 157.9, 147.3, 145.5, 144.7, 137.1, 131.8, 131.3, 130.8, 127.2, 122.6, 121.8, 121.4, 103.1, 55.3. HRMS (ESI) *m/z*: [M+H]<sup>+</sup> calcd for C<sub>16</sub>H<sub>13</sub>BrNO: 314.0180, found: 314.0180.

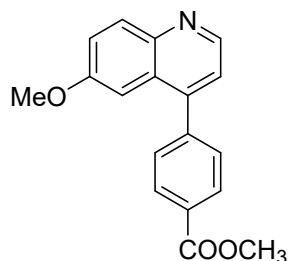

#### Methyl 4-(6-methoxyquinolin-4-yl)benzoate (4t):

Obtained as a yellow solid (89.4 mg, 61% yield), m.p.: 104-105 °C; <sup>1</sup>H-NMR (500 MHz, CDCl<sub>3</sub>) δ (ppm) 8.82 (d, *J* = 4.5 Hz, 1H), 8.21 (d, *J* = 7.9 Hz, 2H), 8.09 (d, *J* = 9.2

Hz, 1H), 7.61 (d,  $J = 7.9$  Hz, 2H), 7.40 (dd,  $J = 9.2, 2.4$  Hz, 1H), 7.29 (d,  $J = 4.3$  Hz, 1H), 7.09 (d,  $J = 2.8$  Hz, 1H), 3.99 (s, 3H), 3.78 (s, 3H).  $^{13}\text{C}$ -NMR (125 MHz,  $\text{CDCl}_3$ )  $\delta$  (ppm) 166.7, 158.1, 147.5, 145.8, 144.8, 143.0, 131.4, 130.1, 129.9, 129.4, 127.2, 122.0, 121.5, 103.2, 55.4, 52.3. HRMS (ESI)  $m/z$ :  $[\text{M}+\text{H}]^+$  calcd for  $\text{C}_{18}\text{H}_{16}\text{NO}_3$ : 294.1130, found: 294.1137.

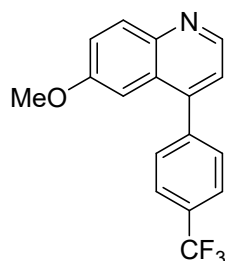

#### 6-Methoxy-4-(4-(trifluoromethyl)phenyl)quinoline (4u) [7]:

Obtained as a white solid (95.5 mg, 63% yield);  $^1\text{H}$ -NMR (500 MHz,  $\text{CDCl}_3$ )  $\delta$  (ppm) 8.82 (d,  $J = 4.3$  Hz, 1H), 8.10 (d,  $J = 9.2$  Hz, 1H), 7.80 (d,  $J = 8.0$  Hz, 2H), 7.64 (d,  $J = 7.9$  Hz, 2H), 7.41 (dd,  $J = 9.2, 2.8$  Hz, 1H), 7.27 (d,  $J = 4.3$  Hz, 1H), 7.07 (d,  $J = 2.7$  Hz, 1H), 3.80 (s, 3H).  $^{13}\text{C}$ -NMR (125 MHz,  $\text{CDCl}_3$ )  $\delta$  (ppm) 158.2, 147.4, 145.4, 144.8, 142.1 (d,  $J = 1.7$  Hz), 131.5, 130.6 (d,  $J = 32.7$  Hz), 129.7, 127.2, 125.7 (q,  $J = 3.9$  Hz), 124.0 (d,  $J = 272.2$  Hz), 122.0, 121.6, 103.2, 55.5.  $^{19}\text{F}$  NMR (470 MHz,  $\text{CDCl}_3$ )  $\delta$  (ppm) -62.6. HRMS (ESI)  $m/z$ :  $[\text{M}+\text{H}]^+$  calcd for  $\text{C}_{17}\text{H}_{13}\text{F}_3\text{NO}$ : 304.0949, found: 304.0958.

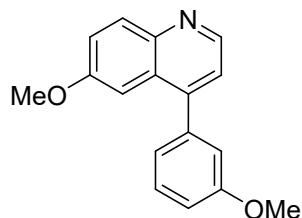

#### 6-Methoxy-4-(3-methoxyphenyl)quinoline (4v):

Obtained as a yellow liquid (95.5 mg, 75% yield);  $^1\text{H}$ -NMR (500 MHz,  $\text{CDCl}_3$ )  $\delta$  (ppm) 8.78 (d,  $J = 4.4$  Hz, 1H), 8.07 (d,  $J = 9.2$  Hz, 1H), 7.43 (t,  $J = 7.9$  Hz, 1H), 7.37 (dd,  $J = 9.2, 2.8$  Hz, 1H), 7.27 (d,  $J = 4.3$  Hz, 1H), 7.22 (d,  $J = 2.8$  Hz, 1H), 7.09 (d,  $J = 7.6$  Hz, 1H), 7.07-7.04 (m, 1H), 7.04-7.00 (m, 1H), 3.85 (s, 3H), 3.78 (s, 3H).  $^{13}\text{C}$ -NMR (125 MHz,  $\text{CDCl}_3$ )  $\delta$  (ppm) 159.7, 157.8, 147.4, 146.8, 144.8, 139.6, 131.2, 129.6, 127.5, 121.7, 121.6, 121.5, 114.8, 113.8, 103.6, 55.34, 55.26. HRMS (ESI)  $m/z$ :  $[\text{M}+\text{H}]^+$  calcd for  $\text{C}_{17}\text{H}_{16}\text{NO}_2$ : 266.1181, found: 266.1184.

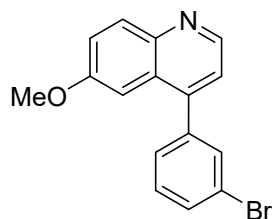

**4-(3-Bromophenyl)-6-methoxyquinoline (4w)** <sup>[7]</sup>:

Obtained as a yellow liquid (112.7 mg, 72% yield); <sup>1</sup>H-NMR (500 MHz, CDCl<sub>3</sub>) δ (ppm) 8.79 (d, *J* = 4.4 Hz, 1H), 8.07 (d, *J* = 9.2 Hz, 1H), 7.67 (t, *J* = 1.8 Hz, 1H), 7.66-7.58 (m, 1H), 7.44 (m, 1H), 7.42-7.36 (m, 2H), 7.25 (d, *J* = 4.4 Hz, 1H), 7.11 (d, *J* = 2.8 Hz, 1H), 3.80 (s, 3H). <sup>13</sup>C-NMR (125 MHz, CDCl<sub>3</sub>) δ (ppm) 158.0, 147.4, 145.3, 144.8, 140.3, 132.2, 131.4, 131.4, 130.1, 127.9, 127.3, 122.8, 121.9, 121.5, 103.2, 55.4. HRMS (ESI) *m/z*: [M+H]<sup>+</sup> calcd for C<sub>16</sub>H<sub>13</sub>BrNO: 314.0180, found: 314.0179.

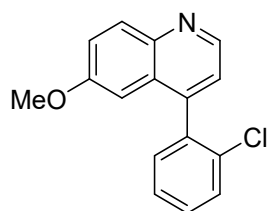

**4-(2-Chlorophenyl)-6-methoxyquinoline (4x)**:

Obtained as a yellow liquid (94.2 mg, 70% yield); <sup>1</sup>H-NMR (500 MHz, CDCl<sub>3</sub>) δ (ppm) 8.71 (d, *J* = 4.4 Hz, 1H), 7.98 (d, *J* = 9.2 Hz, 1H), 7.45 (dd, *J* = 7.8, 1.5 Hz, 1H), 7.34-7.25 (m, 3H), 7.22 (dd, *J* = 7.3, 2.0 Hz, 1H), 7.14 (d, *J* = 4.4 Hz, 1H), 6.64 (d, *J* = 2.8 Hz, 1H), 3.62 (s, 3H). <sup>13</sup>C-NMR (125 MHz, CDCl<sub>3</sub>) δ (ppm) 157.8, 147.2, 144.4, 144.3, 136.8, 133.1, 131.2, 131.1, 129.8, 129.7, 127.7, 126.8, 122.0, 121.8, 103.5, 55.3. HRMS (ESI) *m/z*: [M+H]<sup>+</sup> calcd for C<sub>16</sub>H<sub>13</sub>ClNO: 270.0685, found: 270.0683.

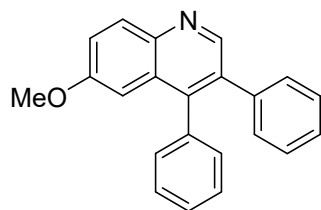

**6-Methoxy-3,4-diphenylquinoline (4y)** <sup>[9]</sup>:

Obtained as a yellow solid (24.9 mg, 16% yield); <sup>1</sup>H-NMR (500 MHz, CDCl<sub>3</sub>) δ (ppm) 8.85 (s, 1H), 8.09 (d, *J* = 9.1 Hz, 1H), 7.45-7.30 (m, 4H), 7.29-7.10 (m, 7H), 6.95 (d, *J* = 2.8 Hz, 1H), 3.73 (s, 3H). <sup>13</sup>C-NMR (125 MHz, CDCl<sub>3</sub>) δ (ppm) 158.0, 149.4, 144.2, 143.7, 138.3, 136.6, 133.4, 131.0, 130.4, 130.1, 128.24, 128.22, 128.0, 127.7, 127.0, 121.4, 104.6, 55.4. HRMS (ESI) *m/z*: [M+H]<sup>+</sup> calcd for C<sub>22</sub>H<sub>18</sub>NO: 312.1388, found: 312.1390.

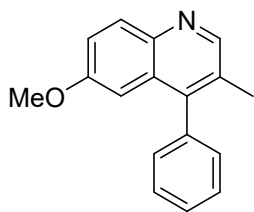

**6-Methoxy-3-methyl-4-phenylquinoline (4z):**

Obtained as a white solid (67.3 mg, 54% yield), m.p.: 78-79 °C; <sup>1</sup>H-NMR (500 MHz, CDCl<sub>3</sub>) δ (ppm) 8.70 (s, 1H), 8.01 (d, *J* = 9.1 Hz, 1H), 7.57-7.49 (m, 2H), 7.49-7.43 (m, 1H), 7.32-7.22 (m, 3H), 6.69 (d, *J* = 2.8 Hz, 1H), 3.67 (s, 3H), 2.22 (s, 3H). <sup>13</sup>C-NMR (125 MHz, CDCl<sub>3</sub>) δ (ppm) 157.7, 150.2, 145.0, 143.0, 137.1, 130.8, 129.1, 128.6, 128.5, 128.2, 127.8, 120.3, 104.0, 55.2, 17.6. HRMS (ESI) *m/z*: [M+H]<sup>+</sup> calcd for C<sub>17</sub>H<sub>16</sub>NO: 250.1232, found: 250.1235.

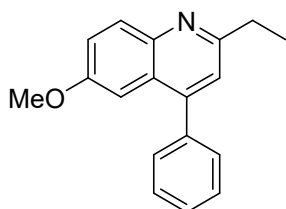

**2-Ethyl-6-methoxy-4-phenylquinoline (4zb)** <sup>[10]</sup>:

Obtained as a yellow solid (32.9 mg, 25% yield); <sup>1</sup>H-NMR (500 MHz, CDCl<sub>3</sub>) δ (ppm) 8.01 (d, *J* = 9.1 Hz, 1H), 7.55-7.50 (m, 4H), 7.50-7.46 (m, 1H), 7.35 (dd, *J* = 9.2, 2.9 Hz, 1H), 7.21 (s, 1H), 7.16 (d, *J* = 2.8 Hz, 1H), 3.77 (s, 3H), 3.00 (q, *J* = 7.6 Hz, 2H), 1.41 (t, *J* = 7.6 Hz, 3H). <sup>13</sup>C-NMR (125 MHz, CDCl<sub>3</sub>) δ (ppm) 161.0, 157.3, 147.4, 144.4, 138.7, 130.6, 129.3, 128.6, 128.2, 126.0, 121.34, 121.27, 103.9, 55.4, 32.0, 14.1. HRMS (ESI) *m/z*: [M+H]<sup>+</sup> calcd for C<sub>18</sub>H<sub>18</sub>NO: 264.1388, found: 264.1398.

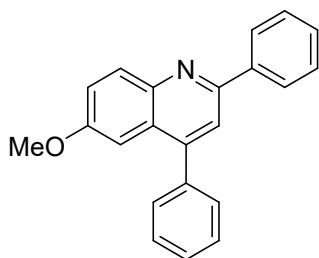

**6-Methoxy-2,4-diphenylquinoline (4zc)** <sup>[11]</sup>:

Obtained as a white solid (96.5 mg, 62% yield); <sup>1</sup>H-NMR (500 MHz, CDCl<sub>3</sub>) δ (ppm) 8.20-8.08 (m, 3H), 7.77 (s, 1H), 7.60-7.52 (m, 4H), 7.53-7.47 (m, 3H), 7.46-7.41 (m, 1H), 7.39 (dd, *J* = 9.2, 2.8 Hz, 1H), 7.19 (d, *J* = 2.8 Hz, 1H), 3.79 (s, 3H). <sup>13</sup>C-NMR (125 MHz, CDCl<sub>3</sub>) δ (ppm) 157.8, 154.6, 147.8, 144.9, 139.7, 138.7, 131.6, 129.3, 129.0, 128.8, 128.7, 128.3, 127.3, 126.6, 121.8, 119.7, 103.7, 55.5. HRMS (ESI) *m/z*: [M+H]<sup>+</sup> calcd for

C<sub>22</sub>H<sub>18</sub>NO: 312.1388, found: 312.1396.

#### 4. References

- [1] (a) Tolstikov, A. G.; Savchenko, R. G.; Lukina, E. S.; Afon'kina, S. R.; Nedopekin, D. V.; Khalilov, L. M.; Odinokov, V. N. *Russ. Chem. Bull., Int. Ed.* **2013**, *62*, 2377-2384;  
(b) Ding, C.; Li, S.; Feng, K.; Ma, C. *Green. Chem.*, **2021**, *23*, 5542.
- [2] Xiang, Y.; Luo, P.; Hao, T.; Xiong, W.; Song, X.; Ding, Q. *Tetrahedron*, **2021**, *79*, 131832.
- [3] Mondal, R. R.; Khamarui, S.; Maiti, D. K. *ACS Omega*, **2016**, *1*, 251.
- [4] Xu, X.; Yang, Y.; Zhang, X.; Yi, W. *Org. Lett.*, **2018**, *20*, 566.
- [5] Chandra, D.; Dhiman, A. K.; Kumar, R.; Sharma, U. *Eur. J. Org. Chem.*, **2019**, *2019*, 2753.
- [6] Qin, F.; Zhang, W. Preparation of quinoline derivative. CN109796403A, **2019**.
- [7] Cen, J.; Li, J.; Zhang, Y.; Zhu, Z.; Yang, S.; Jiang, H. *Org. Lett.*, **2018**, *20*, 4434.
- [8] Roy, B.; Ansary, I.; Samanta, S.; Majumdar, K. C. *Tetrahedron Lett.*, **2012**, *53*, 5119.
- [9] Midya, S. P.; Sahoo, M. K.; Landge, V. G.; Rajamohanan, P. R.; Balaraman, E. *Nature Comm.*, **2015**, *6*, 8591.
- [10] Xu, H.; Yu, F.; Huang, R.; Weng, M.; Chen, H.; Zhang, Z. *Org. Chem. Front.*, **2020**, *7*, 3368.
- [11] Talvitie, J.; Alanko, I.; Bulatov, E.; Koivula, J.; Pöllänen, T.; Helaja, J. *Org. Lett.*, **2022**, *24*, 274.

## 5. $^1\text{H}$ , $^{19}\text{F}$ and $^{13}\text{C}$ NMR spectra of compounds 4

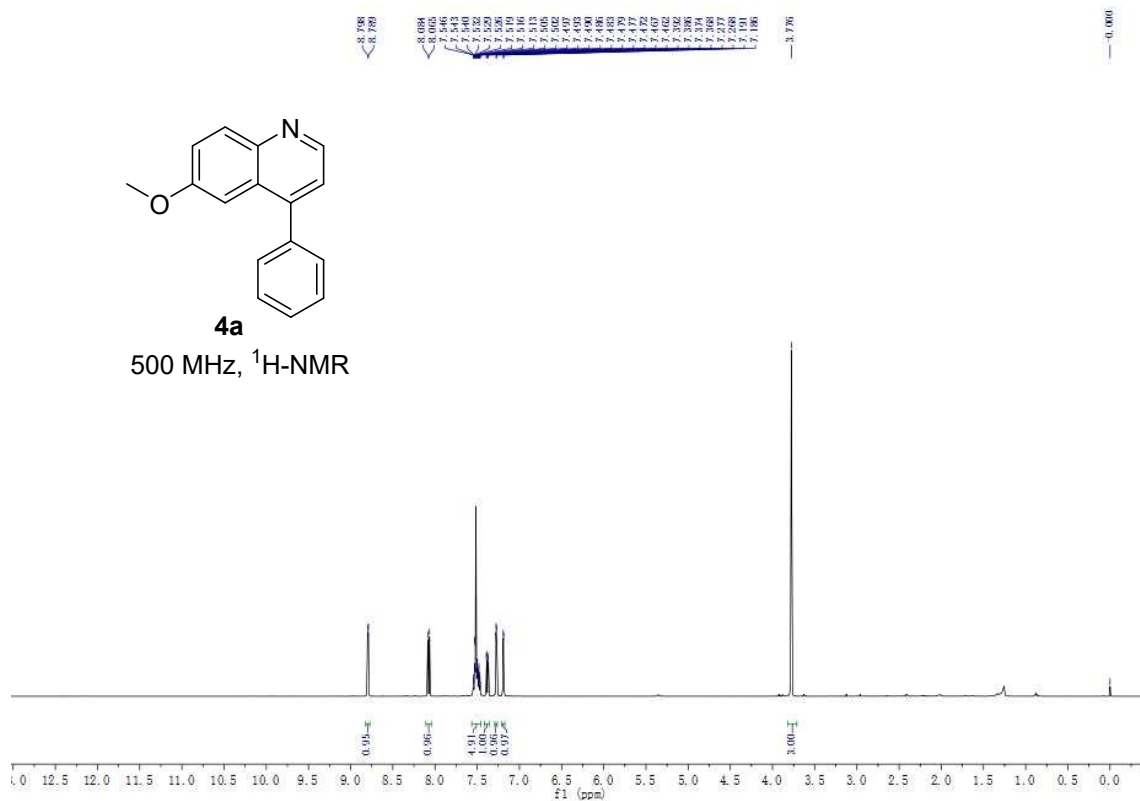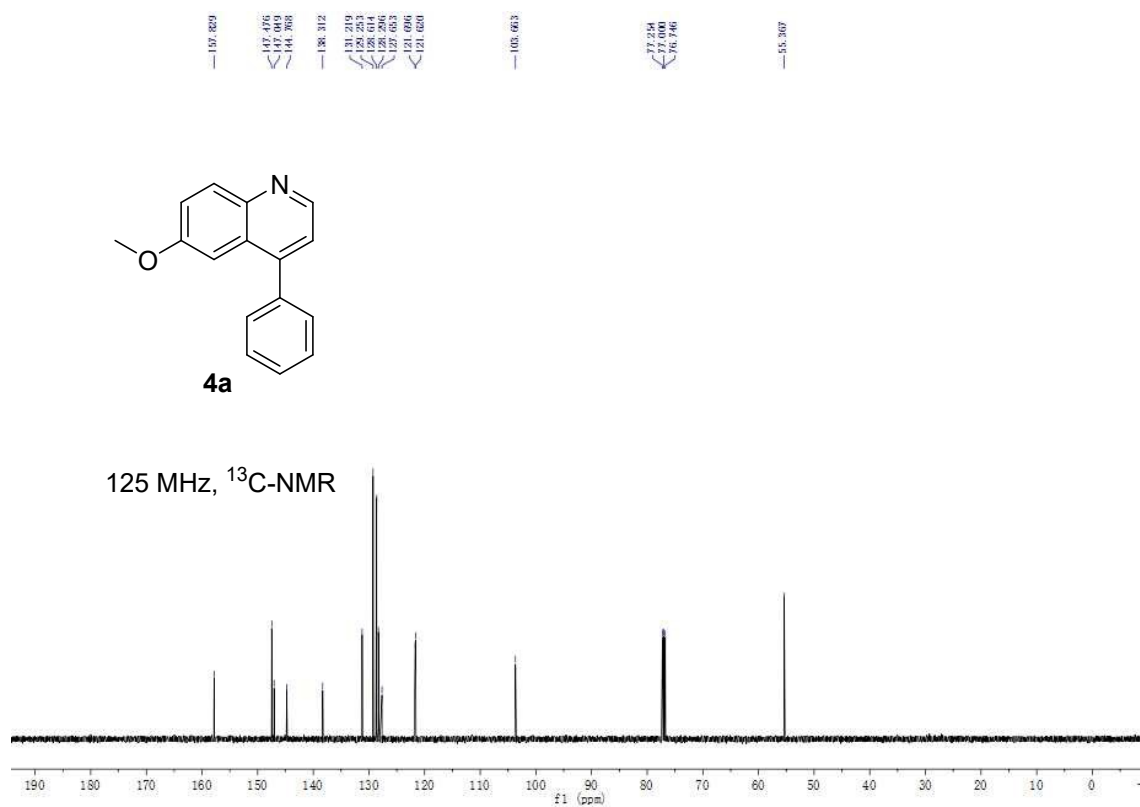

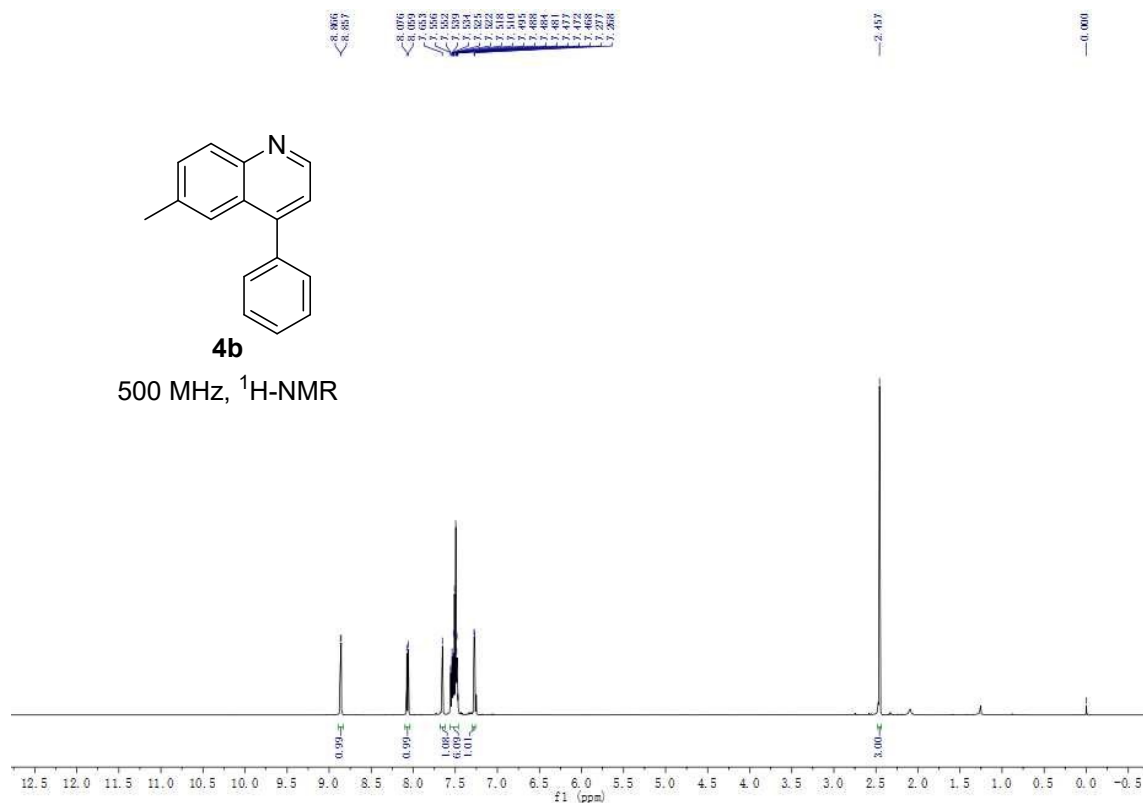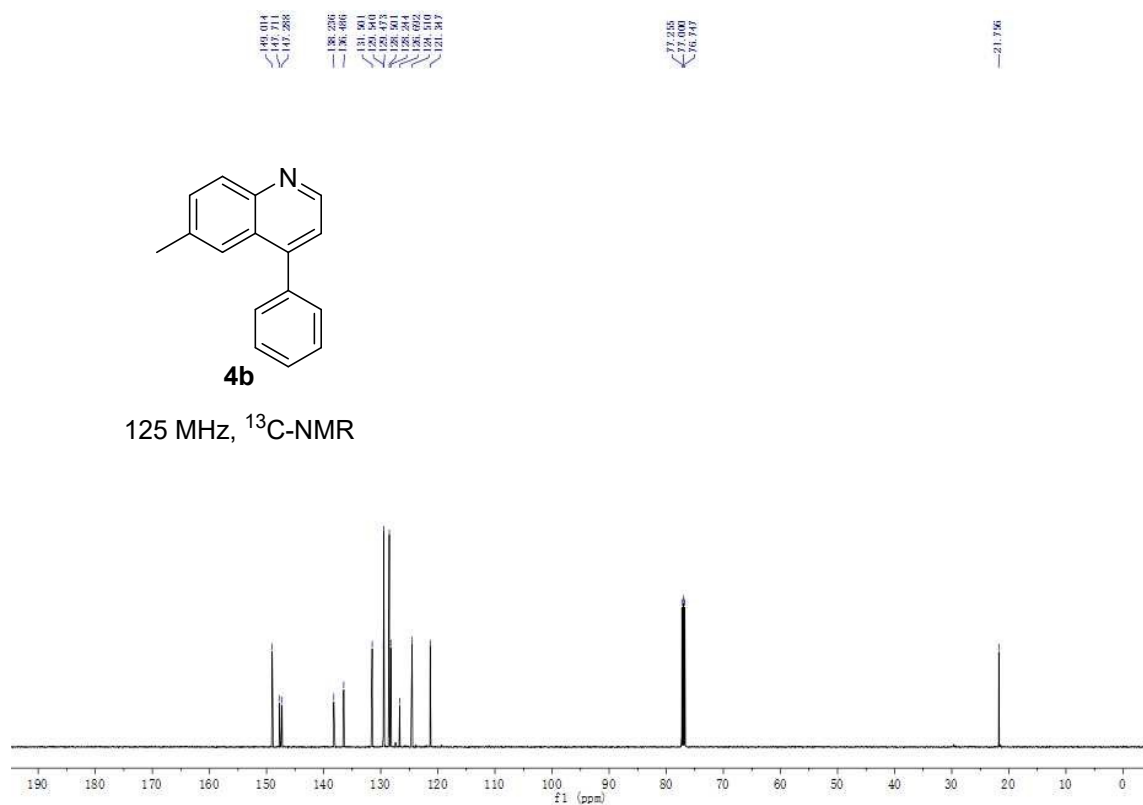

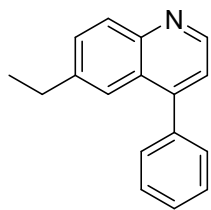

**4c**

500 MHz, <sup>1</sup>H-NMR

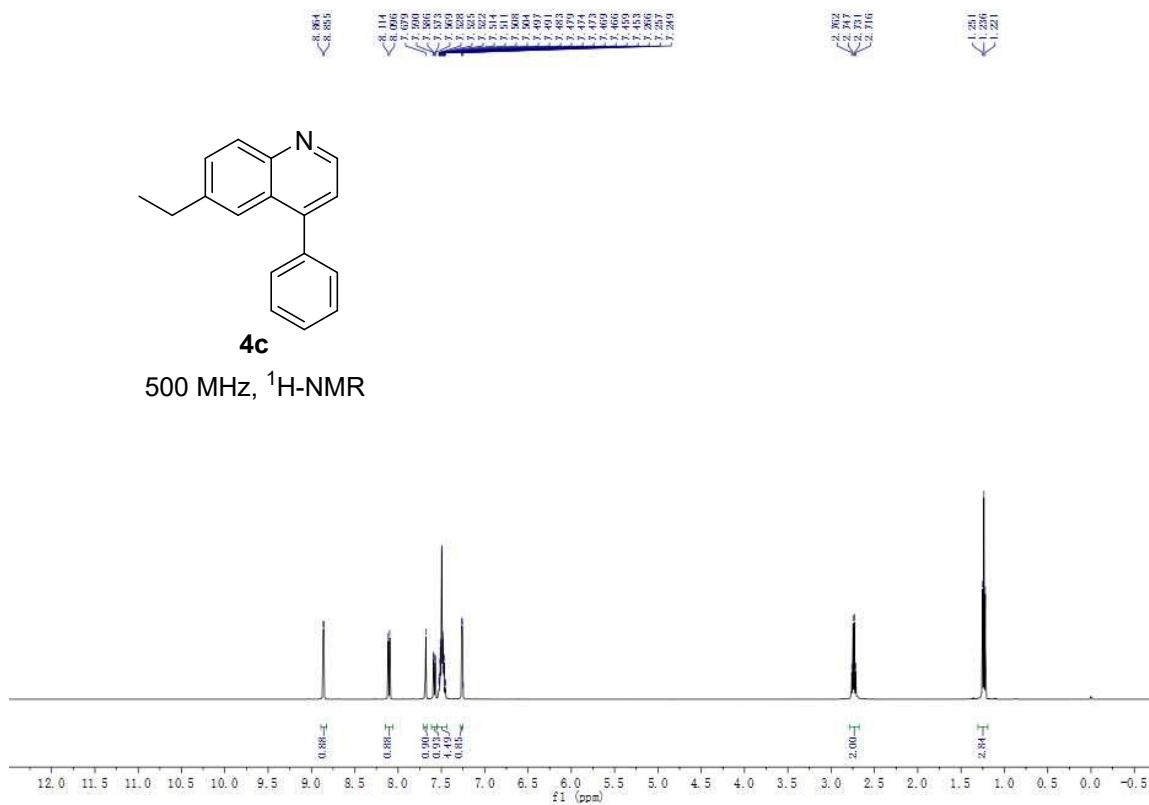



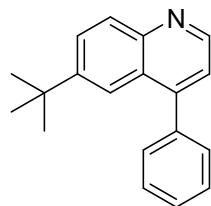

**4d**

500 MHz, <sup>1</sup>H-NMR

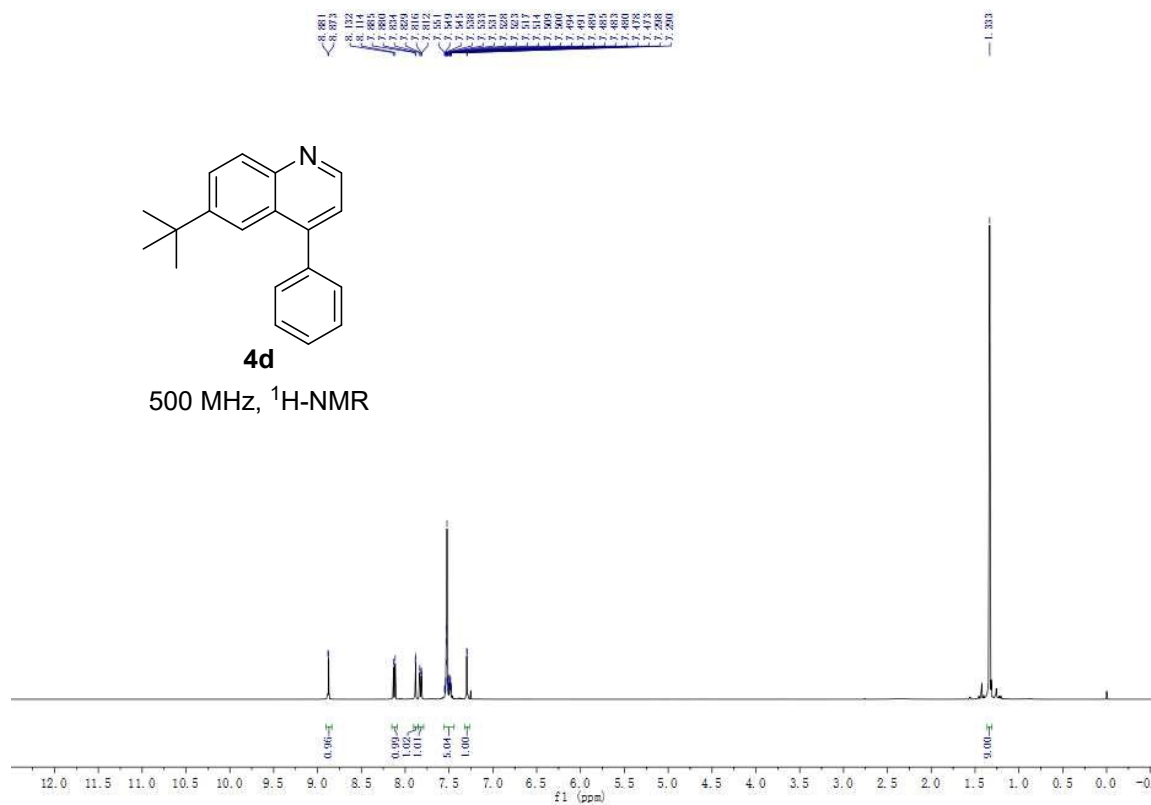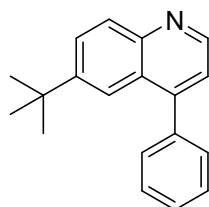

**4d**

125 MHz, <sup>13</sup>C-NMR

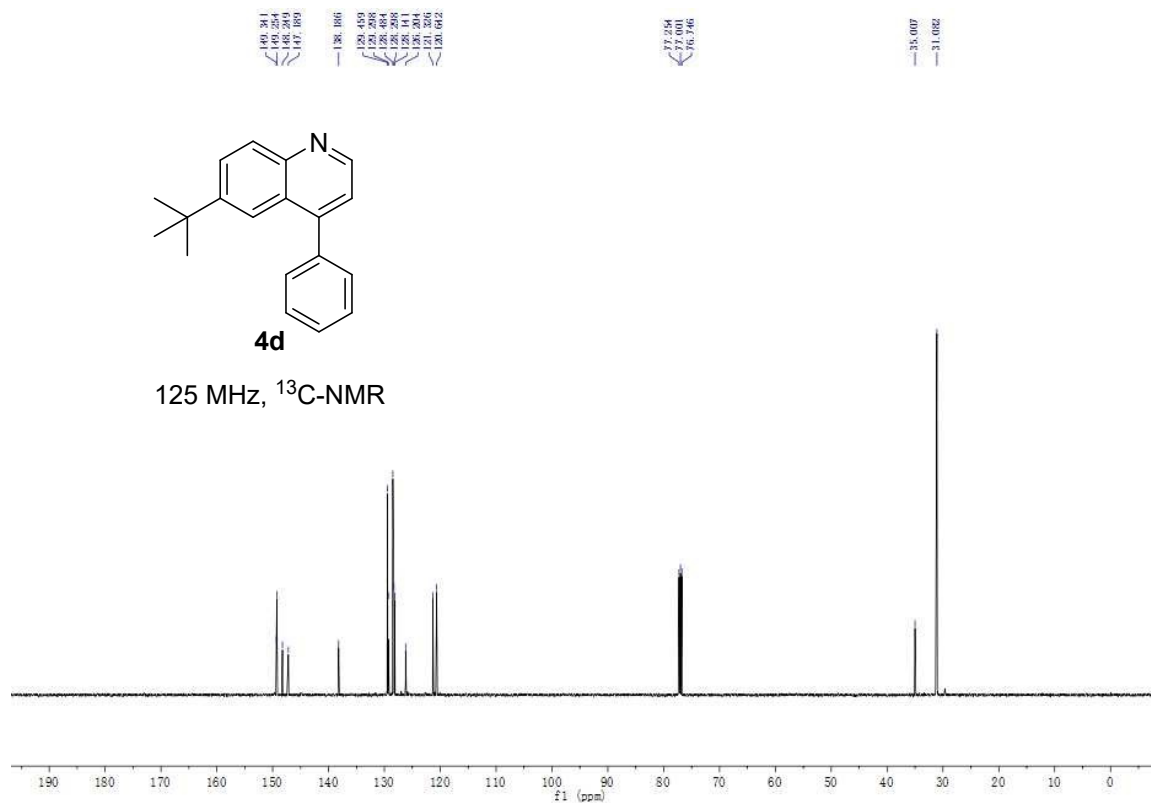

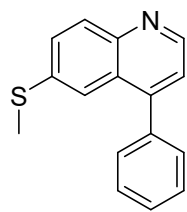

**4e**

500 MHz, <sup>1</sup>H-NMR

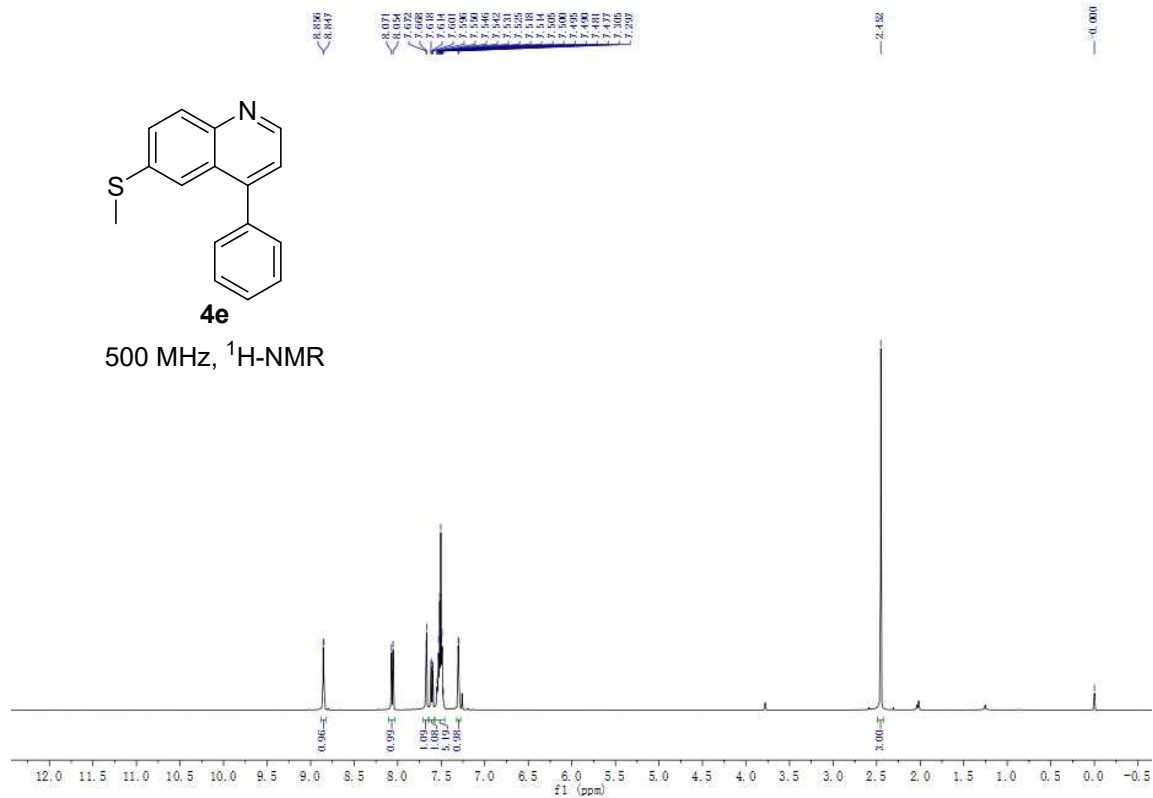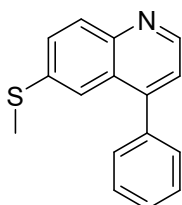

**4e**

125 MHz, <sup>13</sup>C-NMR

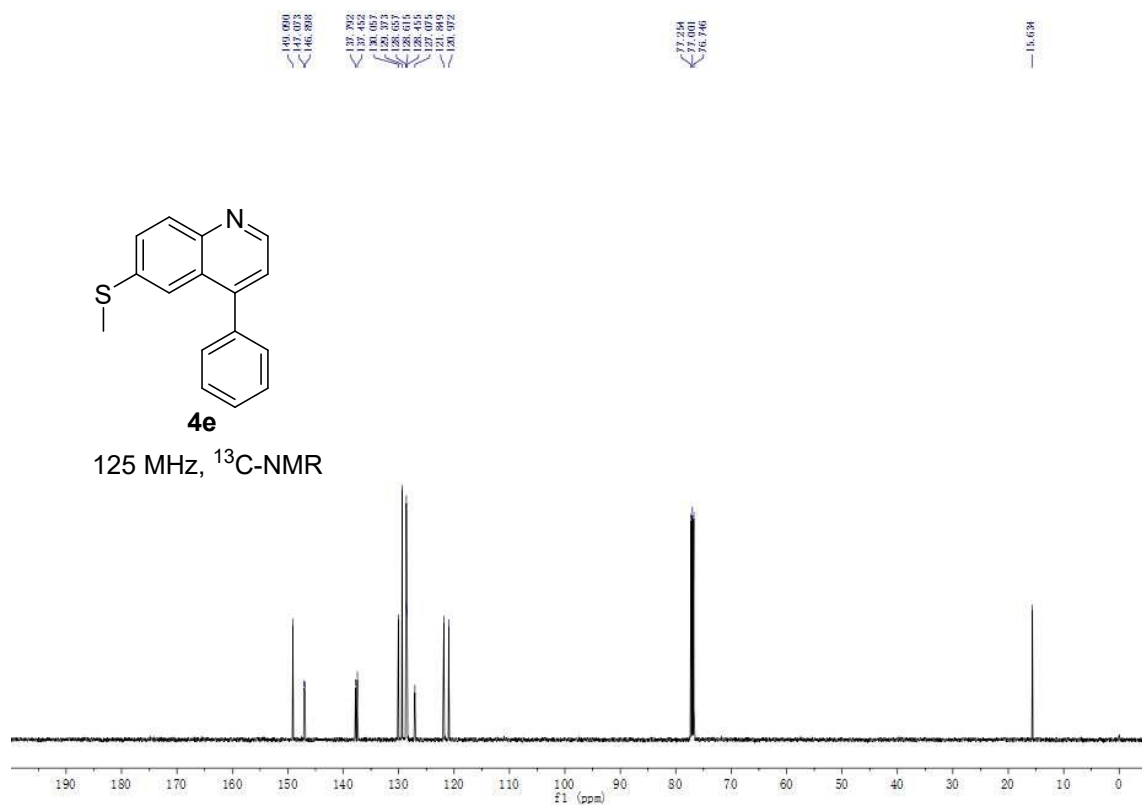

8.932  
8.925  
8.189  
8.172  
7.959  
7.724  
7.710  
7.704  
7.690  
7.687  
7.524  
7.518  
7.483  
7.458  
7.453  
7.438  
7.434  
7.419  
7.414  
7.412  
7.407  
0.000

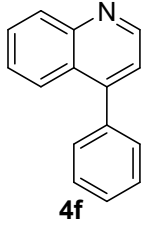

500 MHz, <sup>1</sup>H-NMR

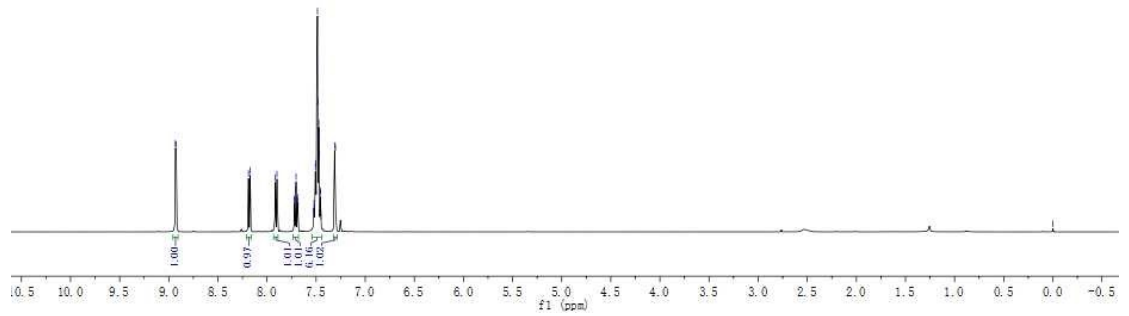

155.884  
155.882  
137.904  
129.438  
129.211  
128.323  
128.071  
125.890  
121.226

77.465  
77.000  
76.746

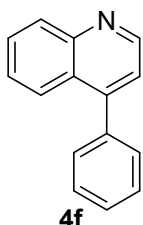

125 MHz, <sup>13</sup>C-NMR

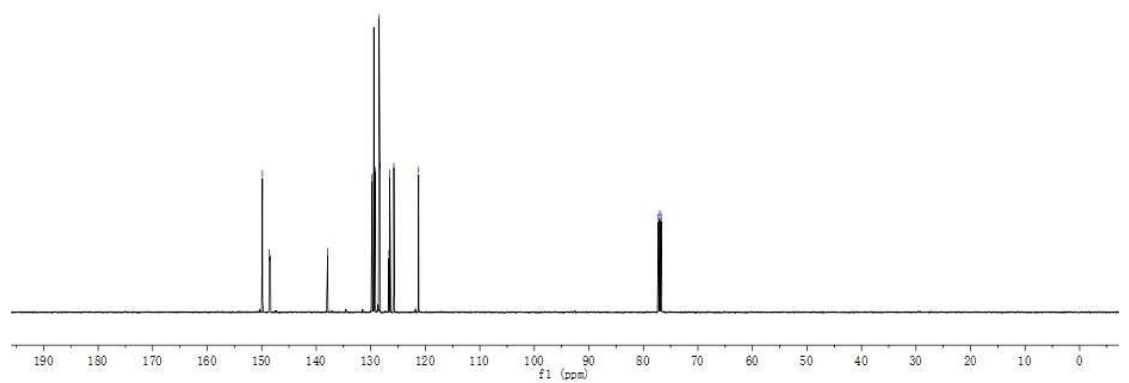

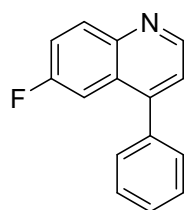

**4g**

500 MHz, <sup>1</sup>H-NMR

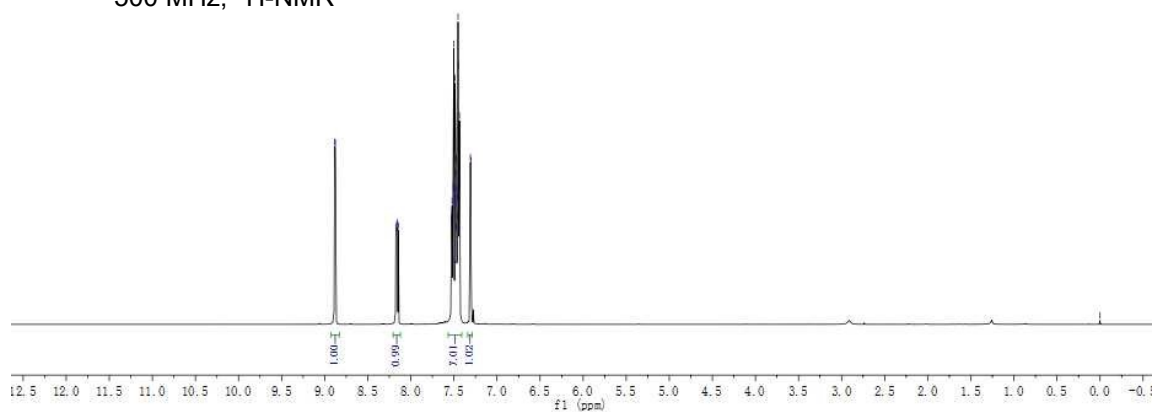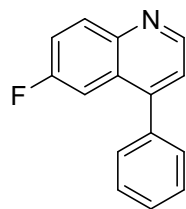

**4g**

470 MHz, <sup>19</sup>F-NMR

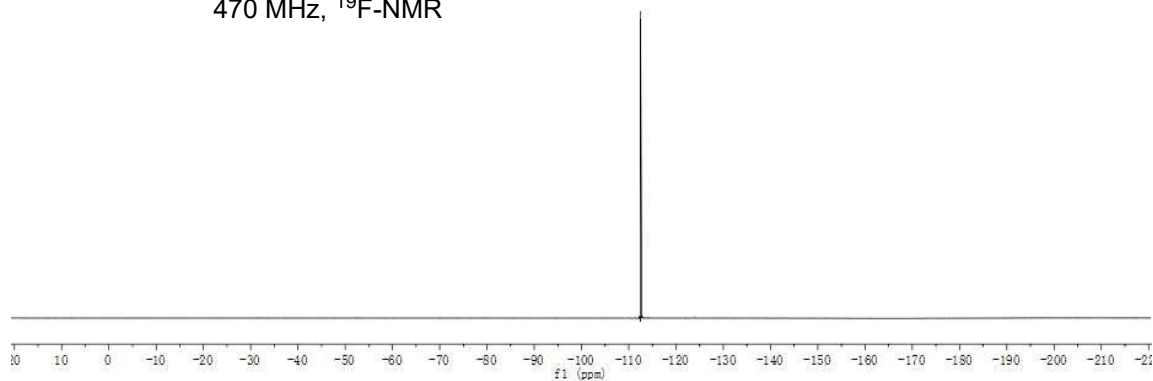

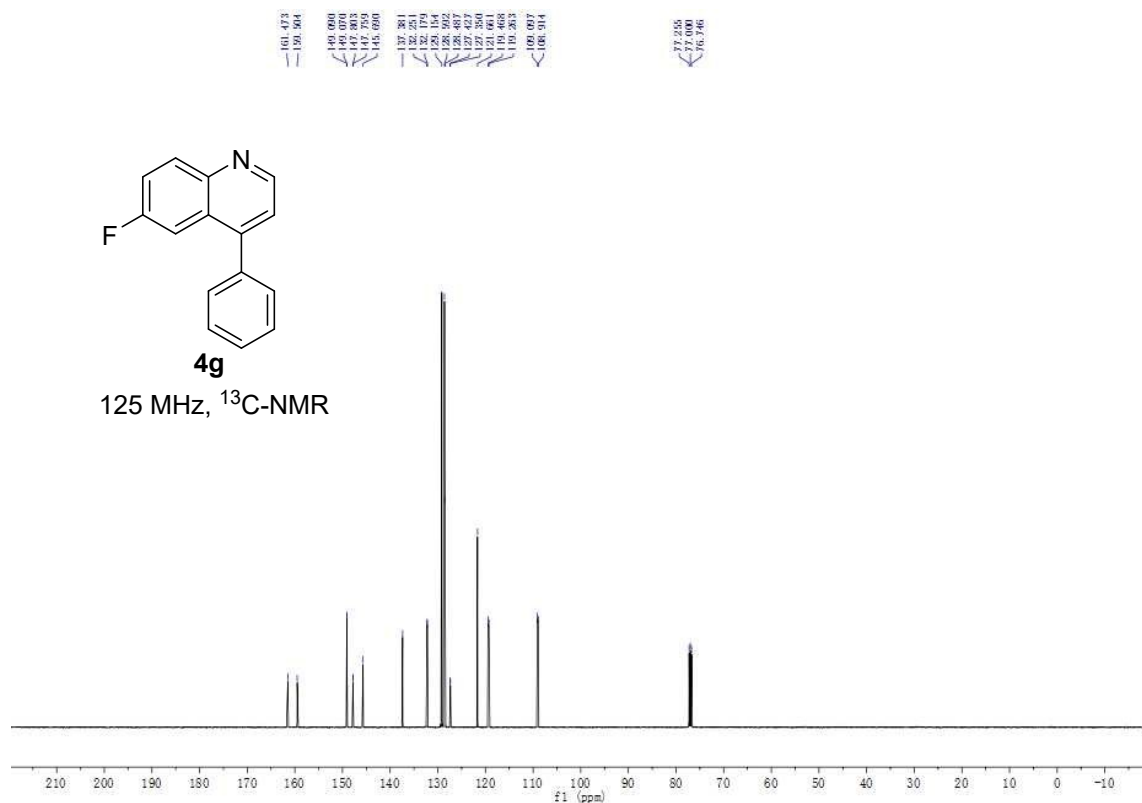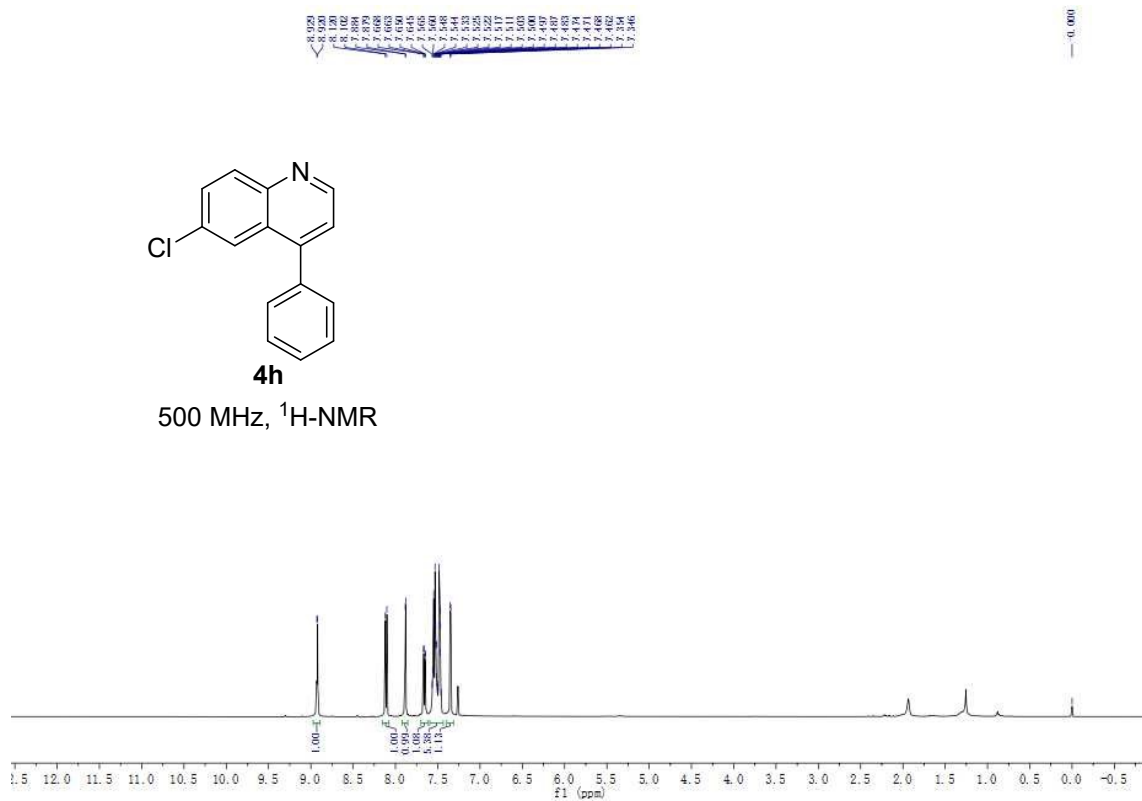

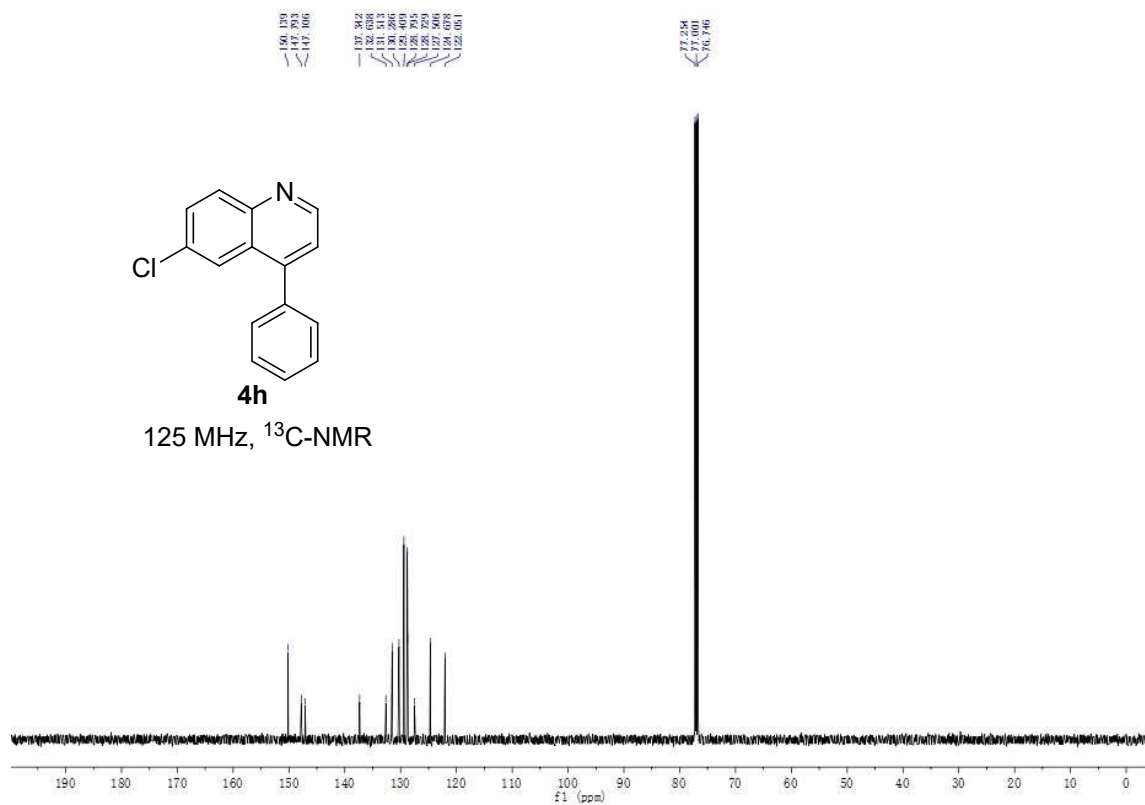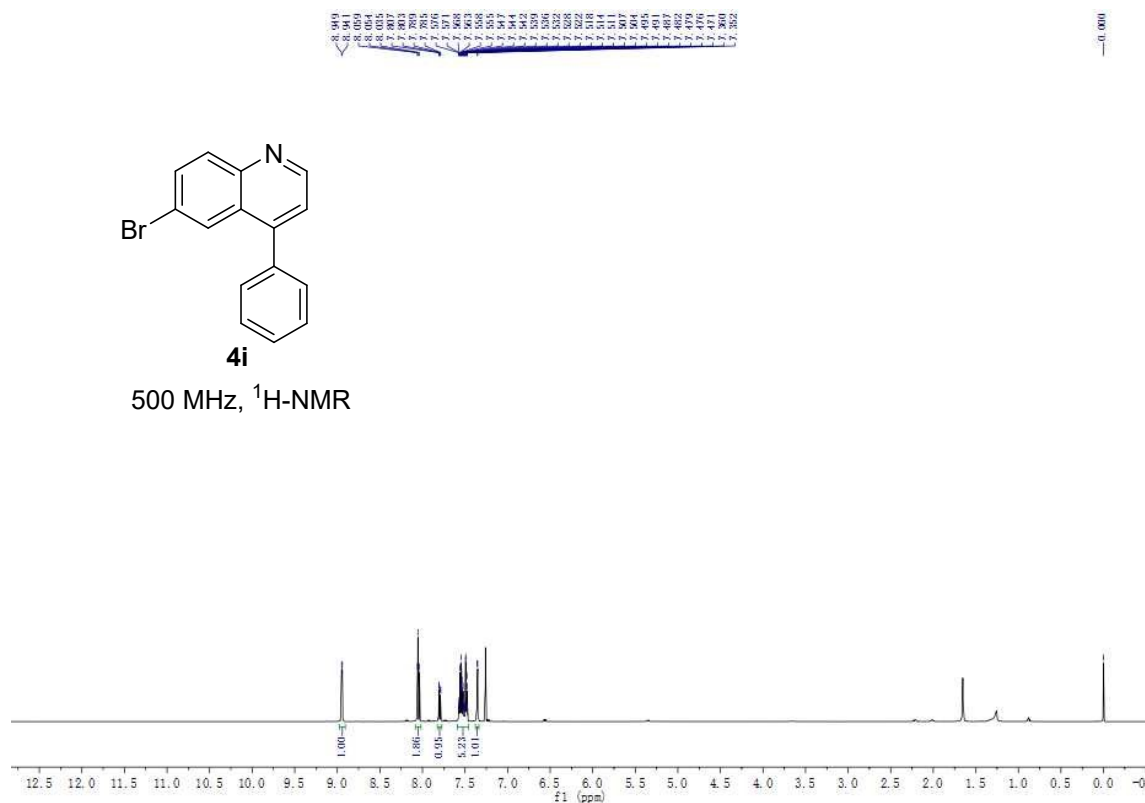

150.300  
147.714  
147.316  
137.309  
132.852  
129.834  
128.829  
128.015  
127.909  
126.817

77.289  
77.238  
77.094  
76.791

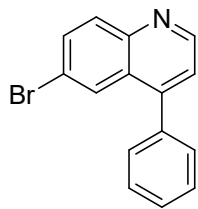

**4i**

125 MHz,  $^{13}\text{C}$ -NMR

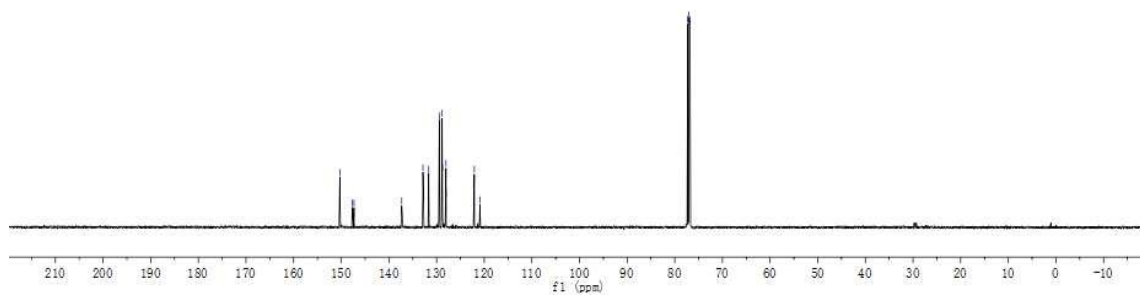

9.076  
9.067  
8.329  
8.328  
8.267  
8.260  
7.876  
7.862  
7.601  
7.590  
7.576  
7.565  
7.549  
7.542  
7.490  
7.485  
7.477

0.000

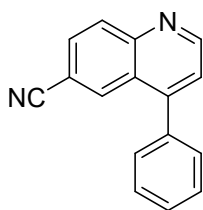

**4j**

500 MHz,  $^1\text{H}$ -NMR

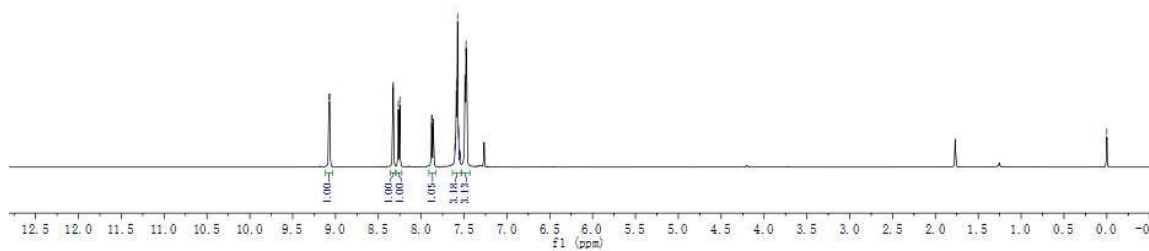

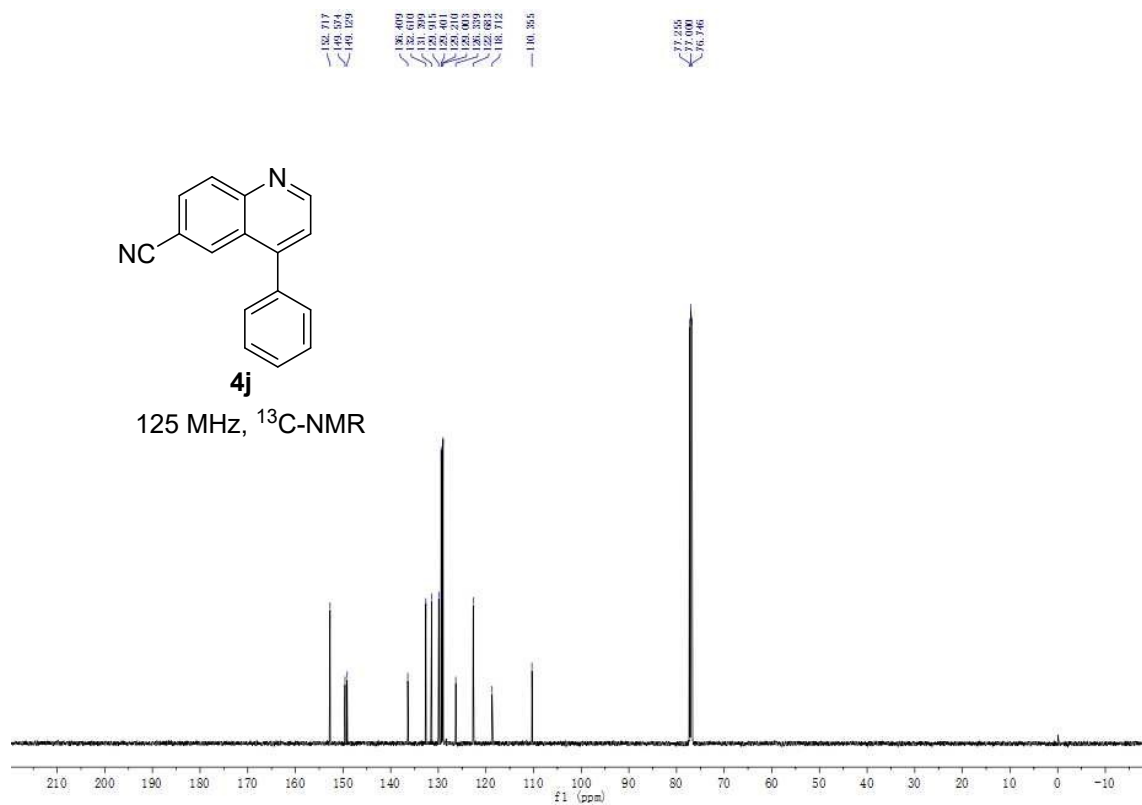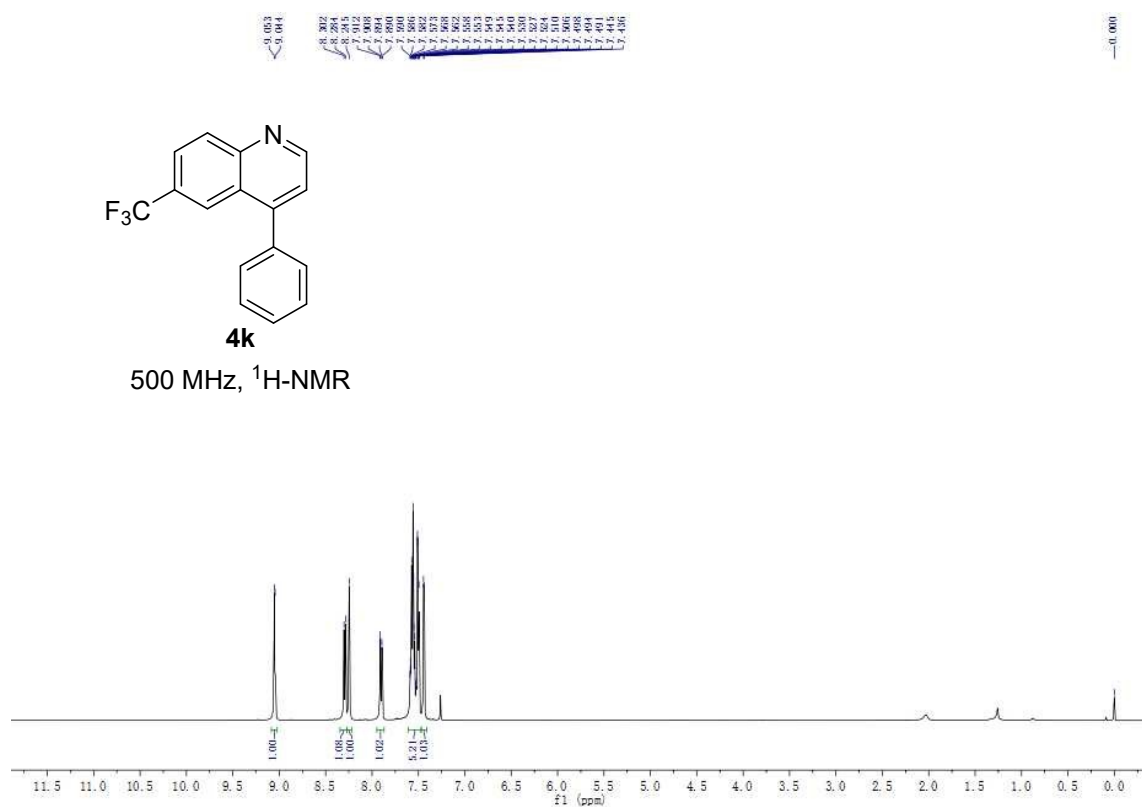





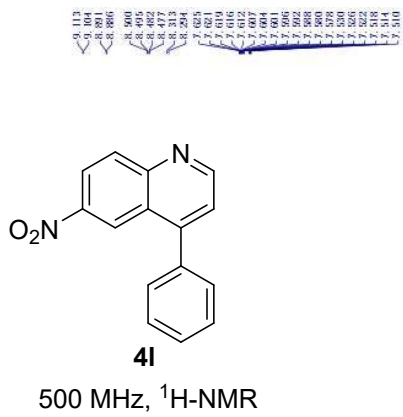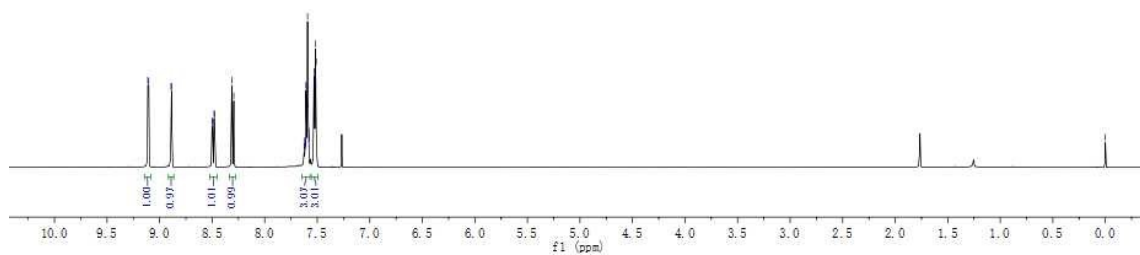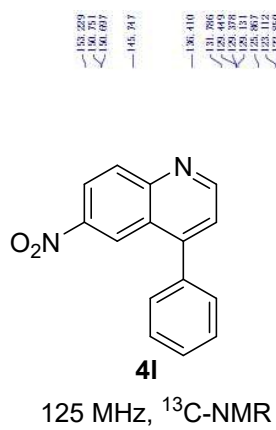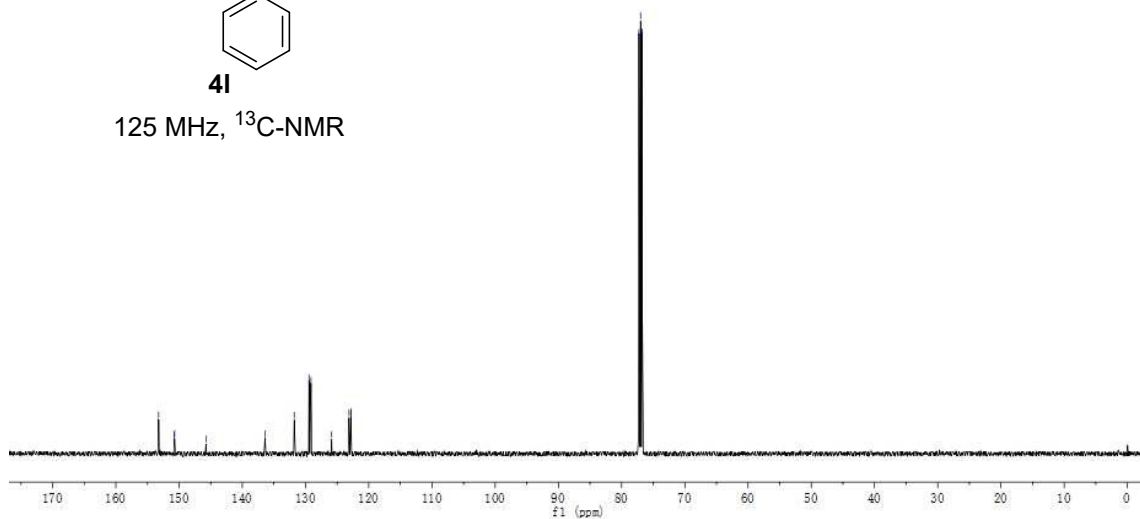

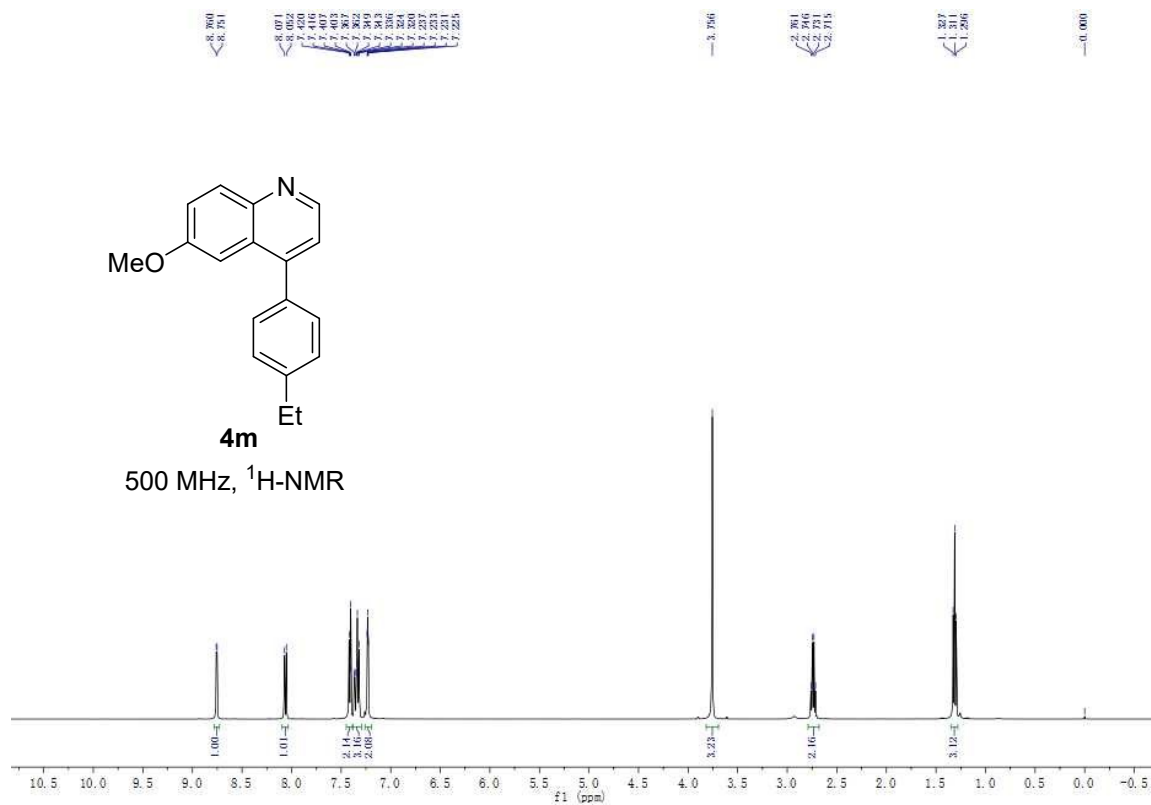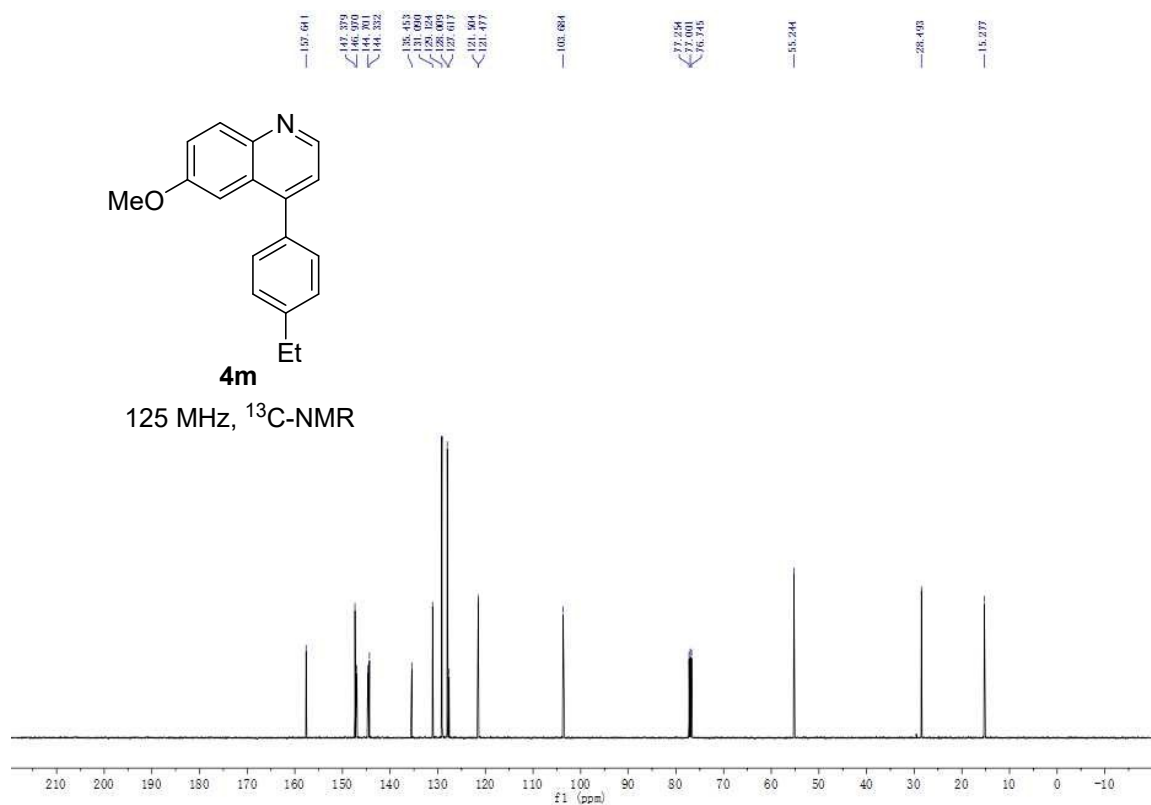

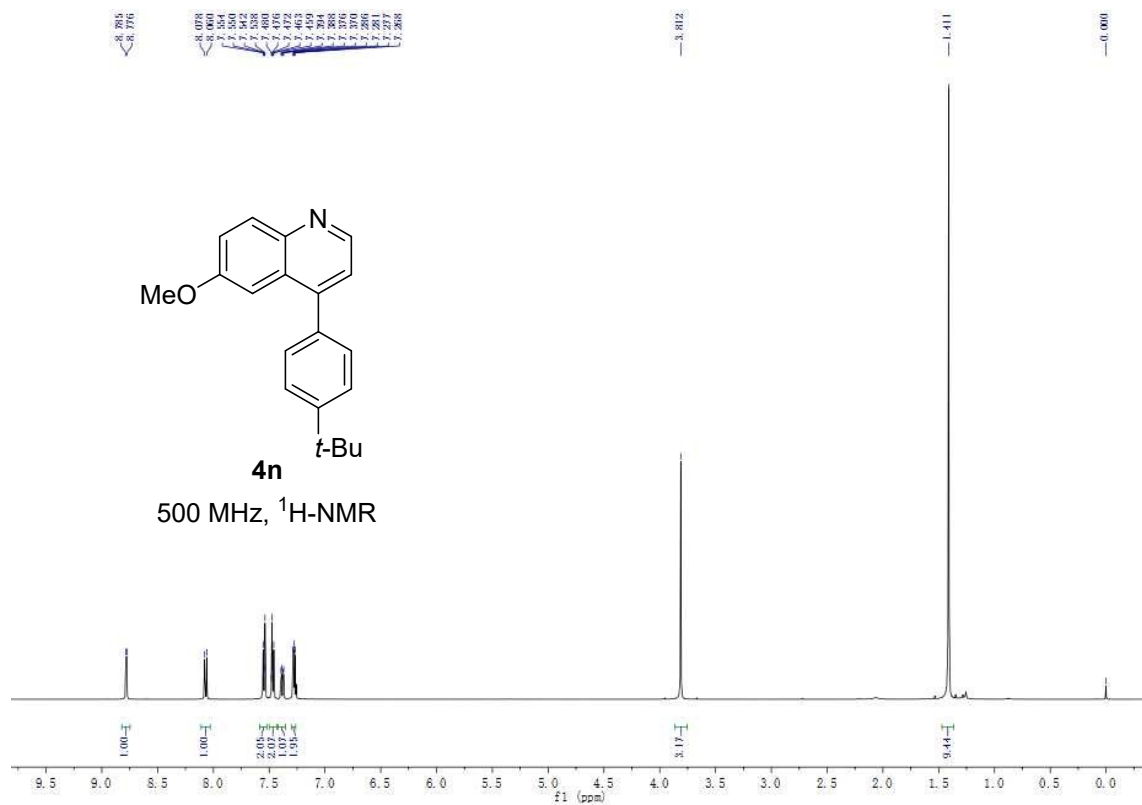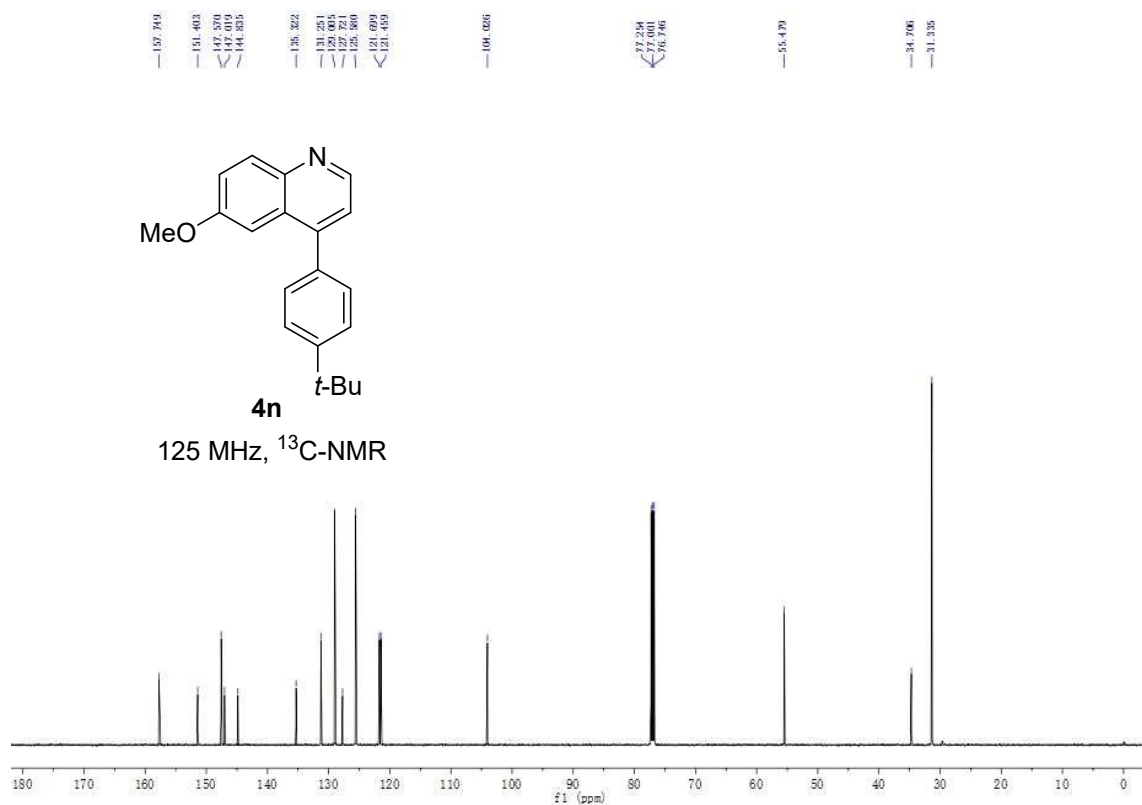

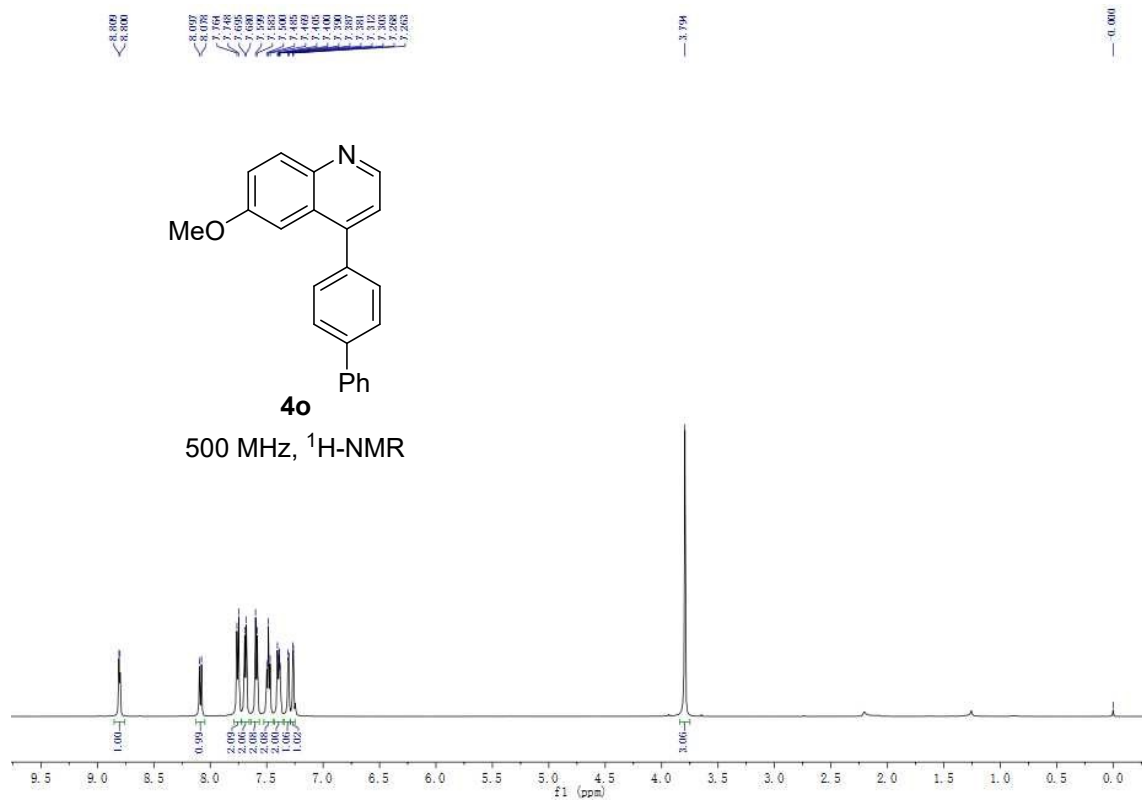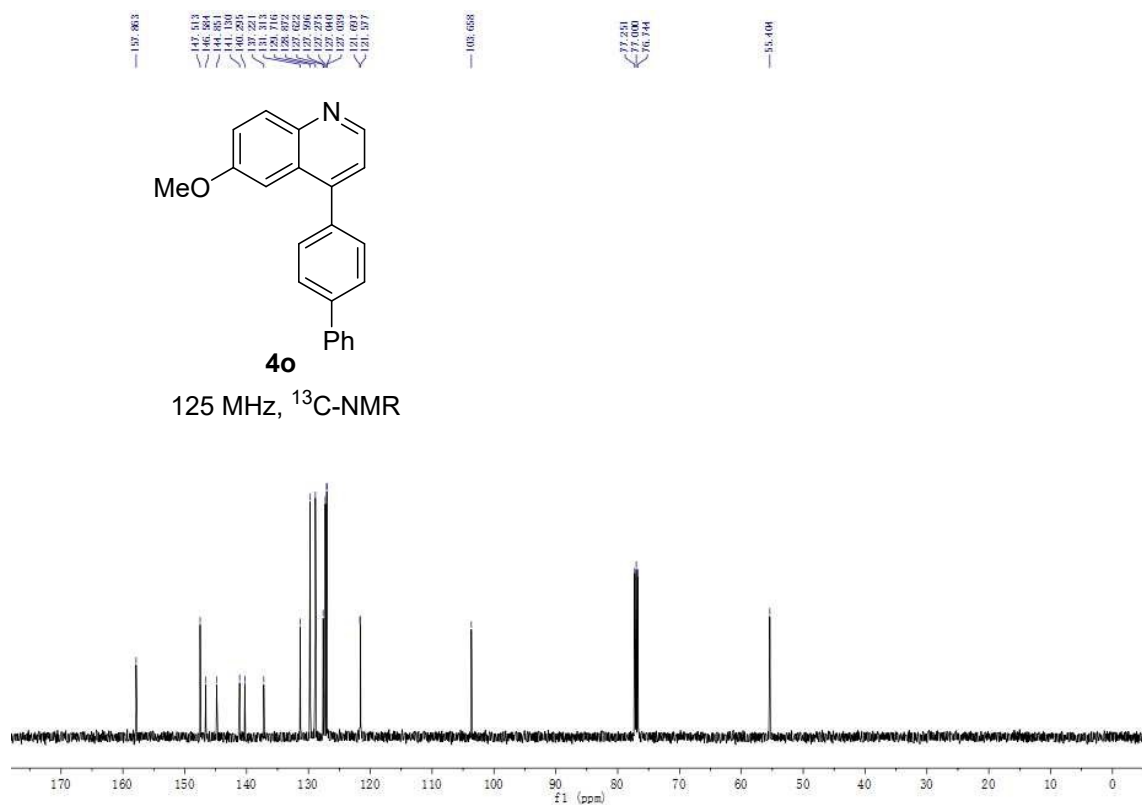

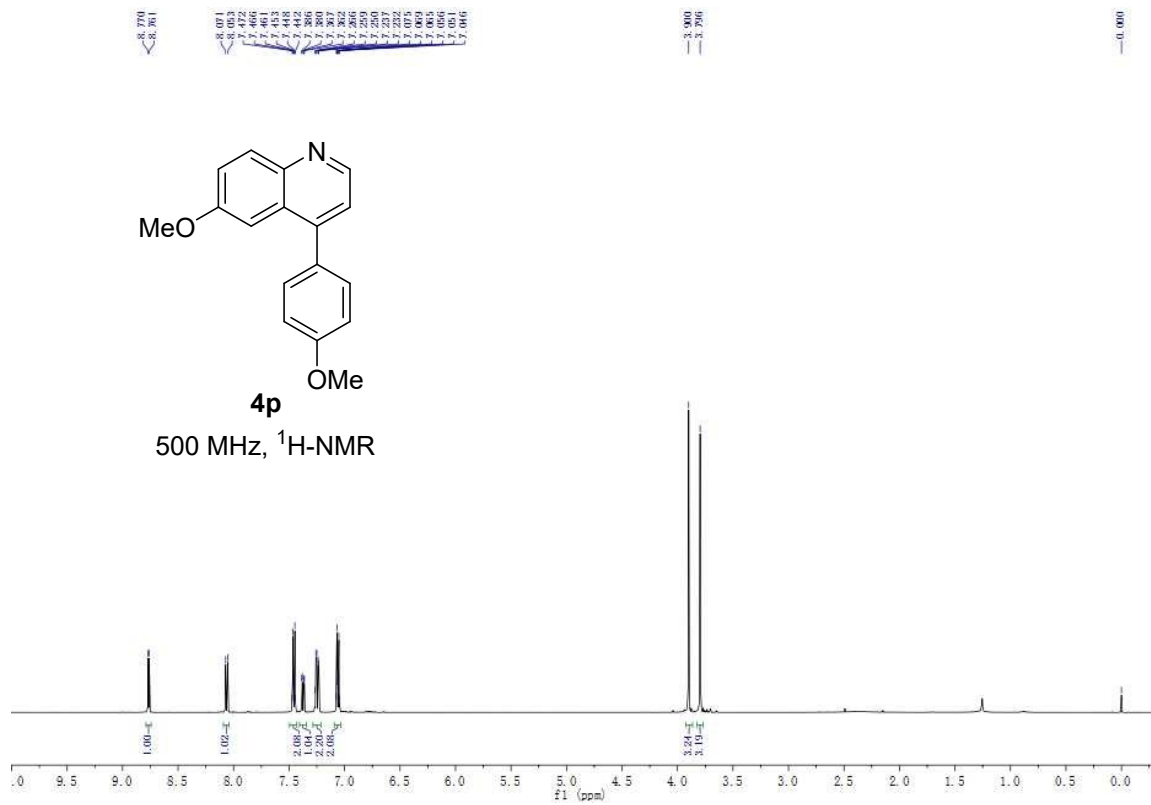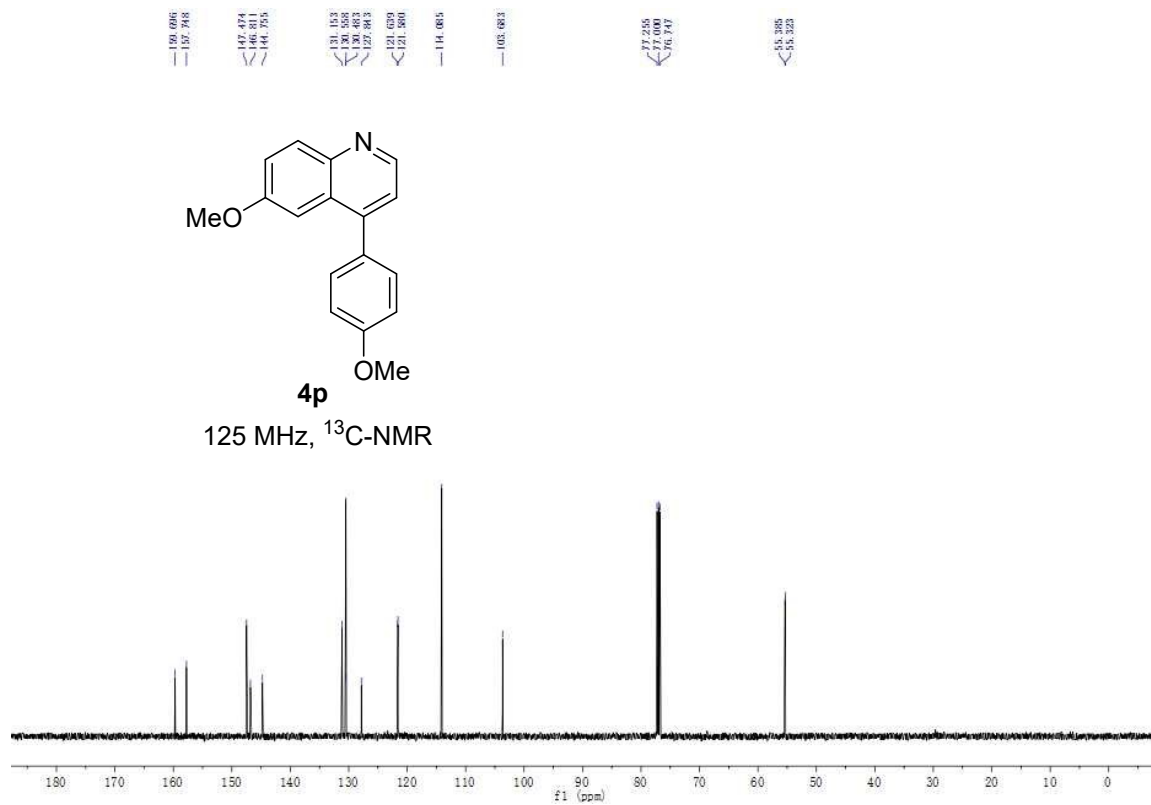

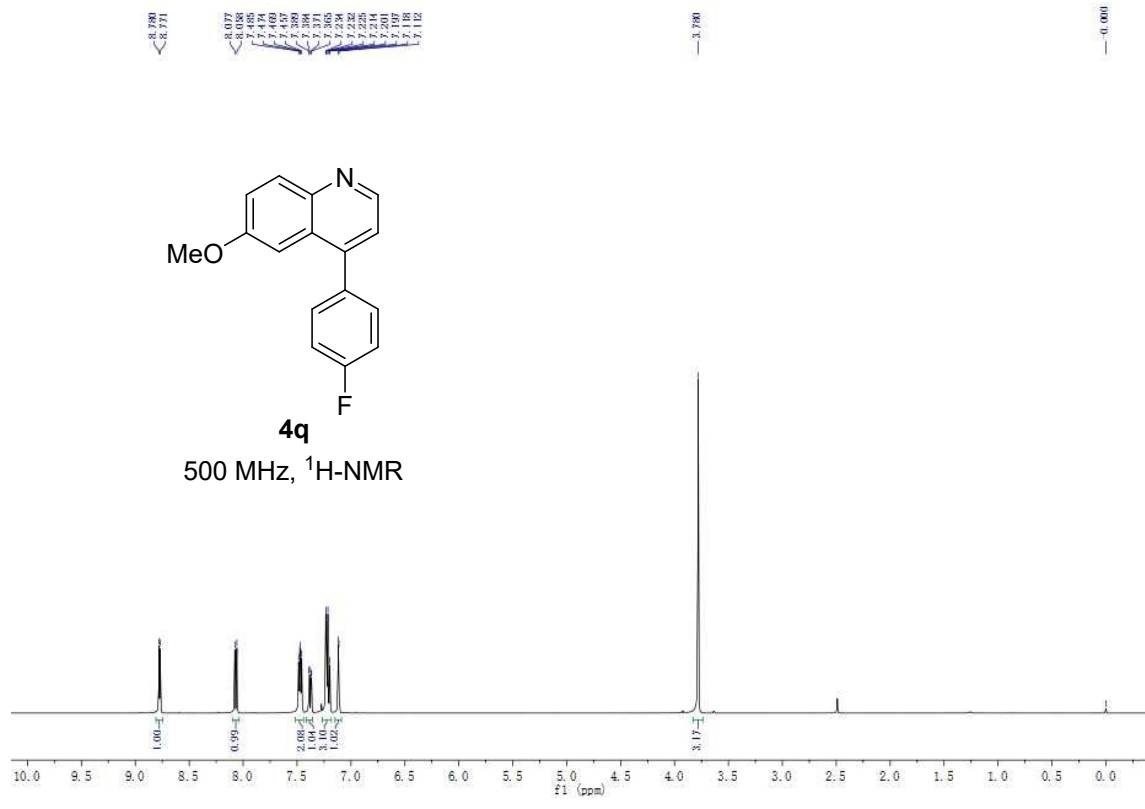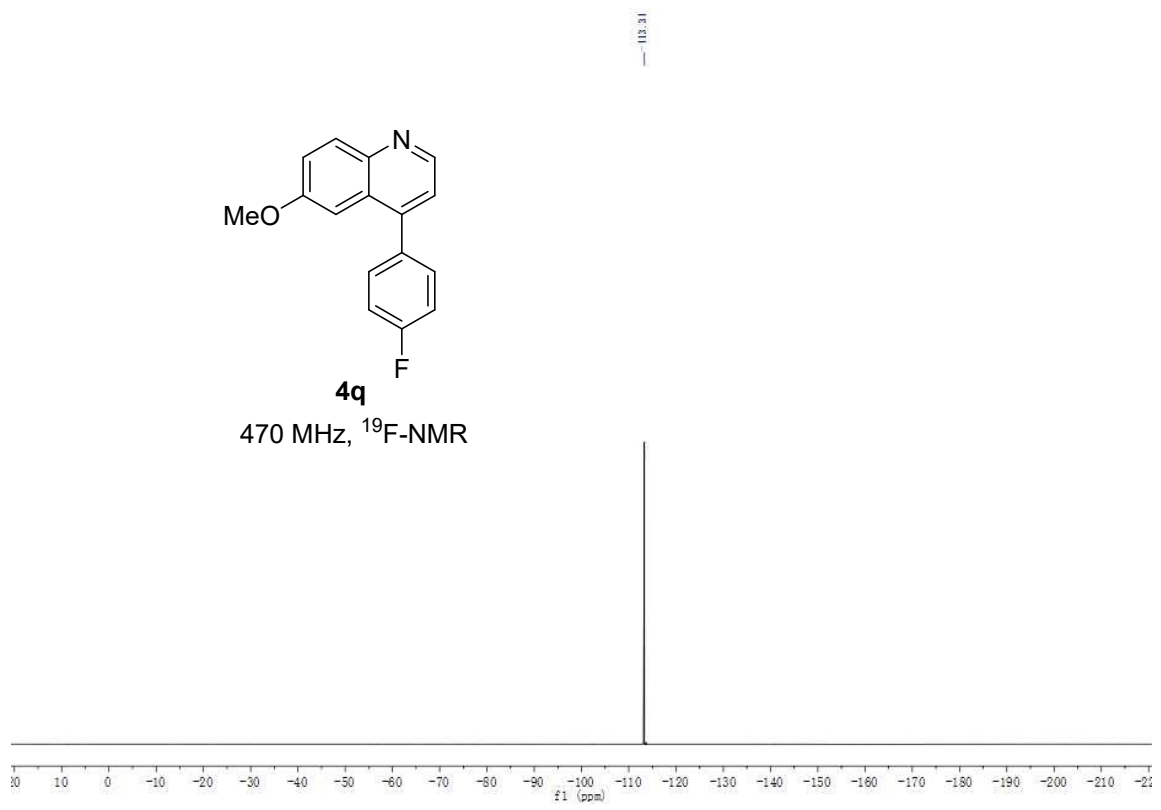

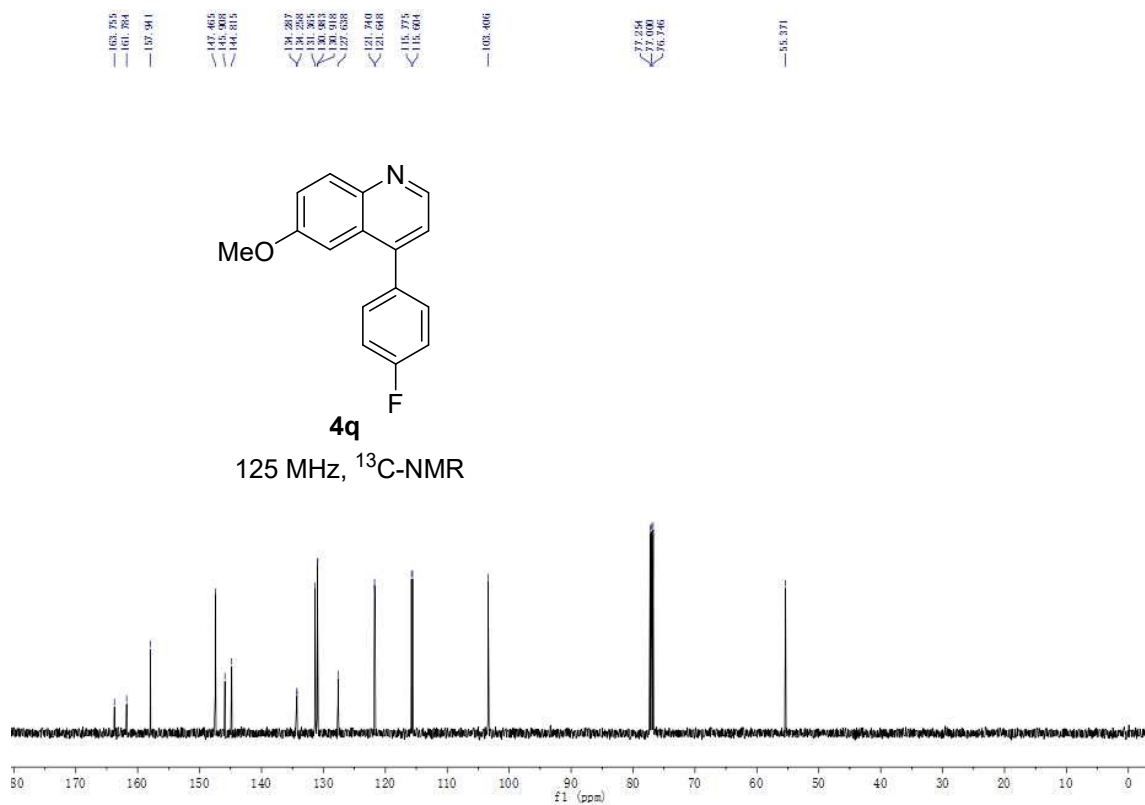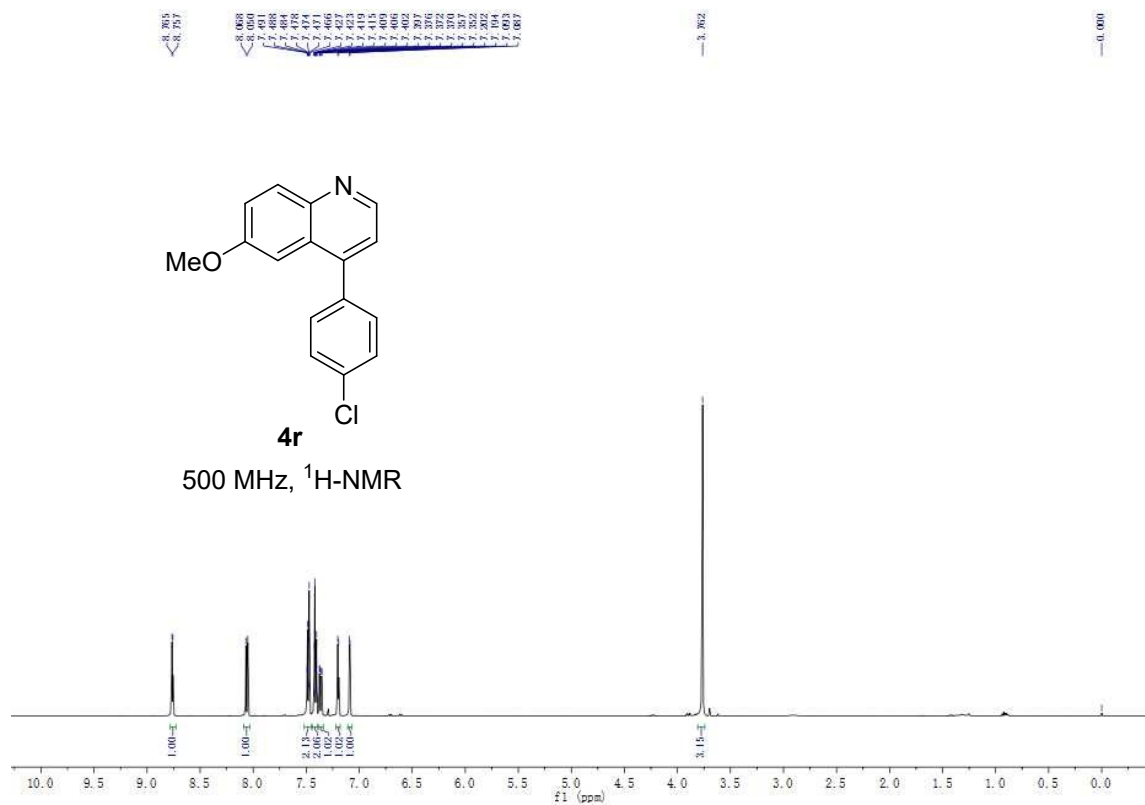



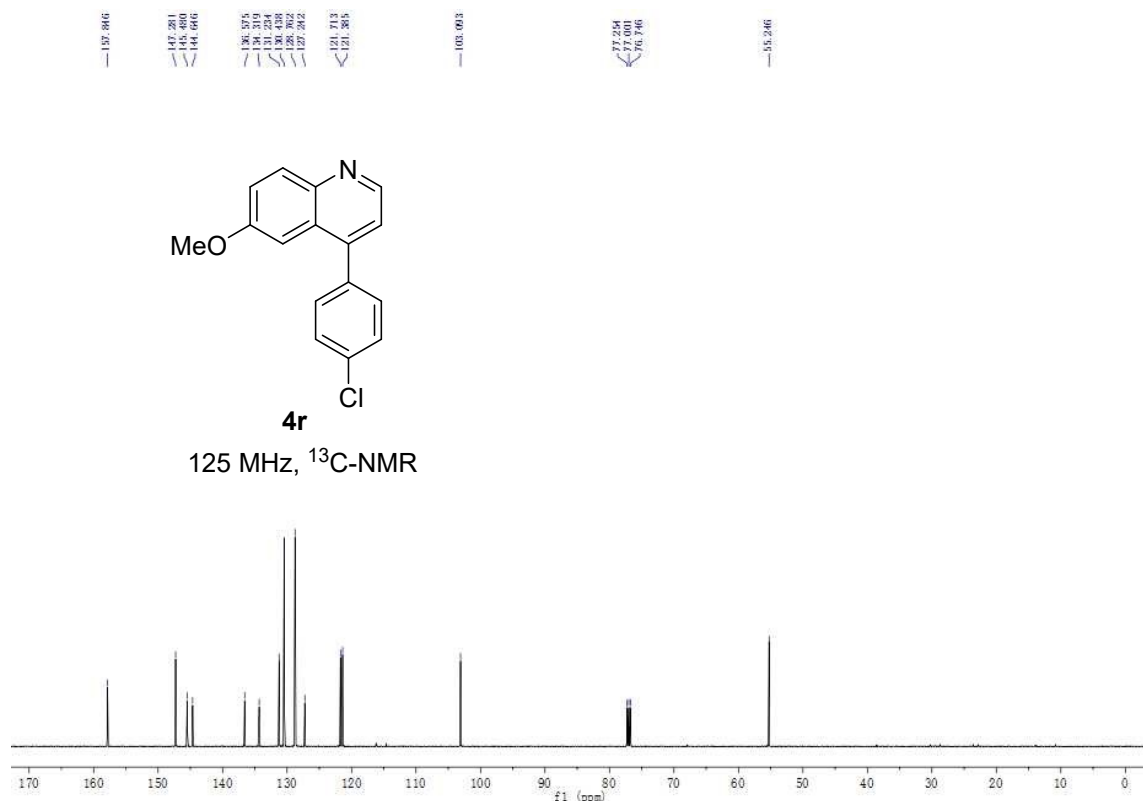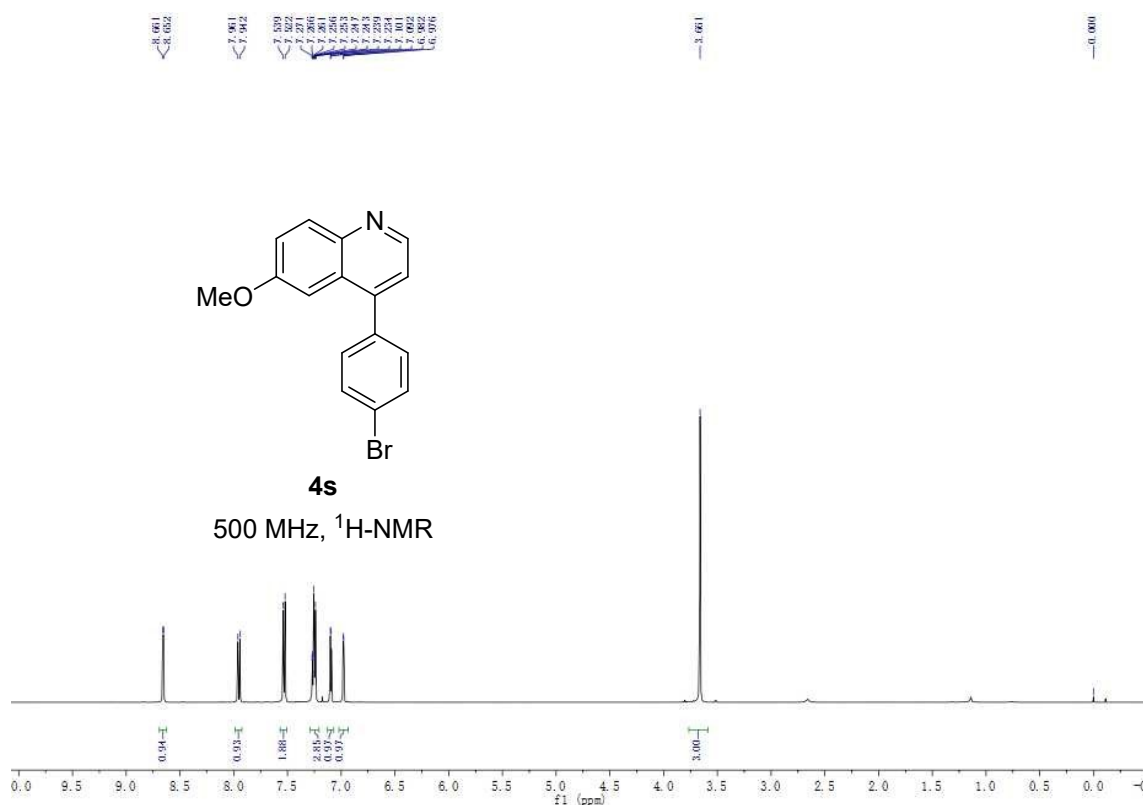

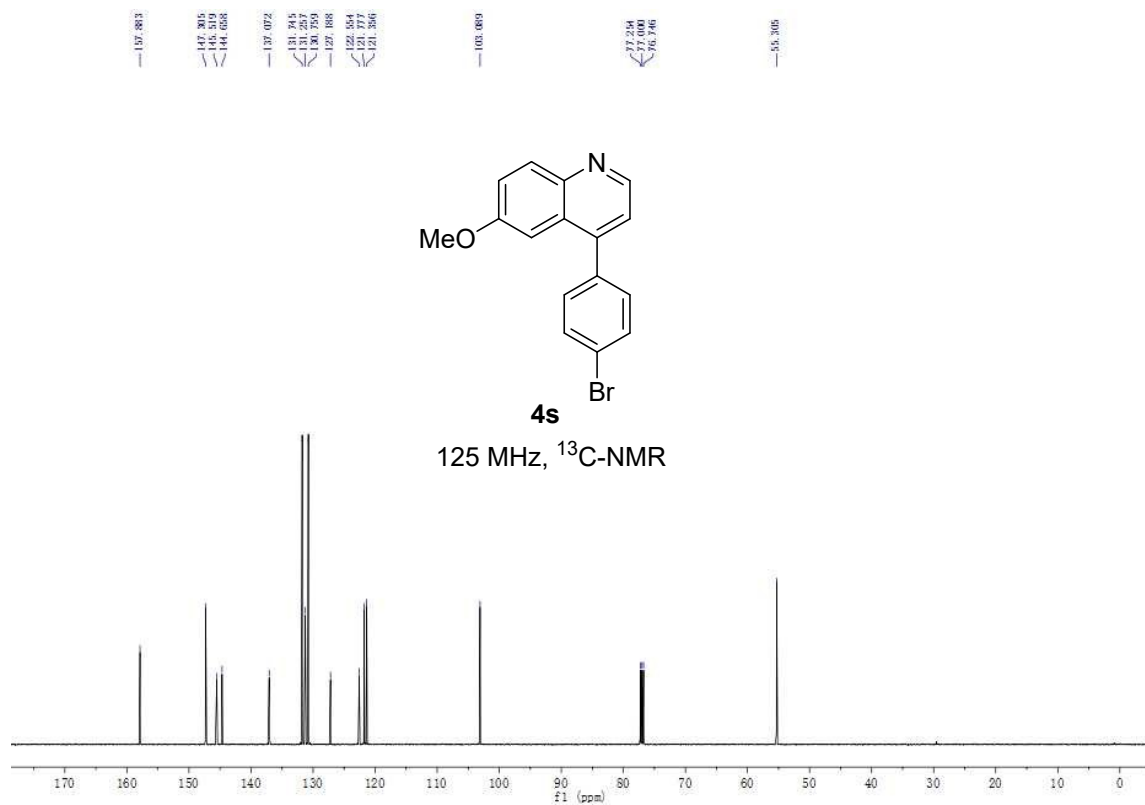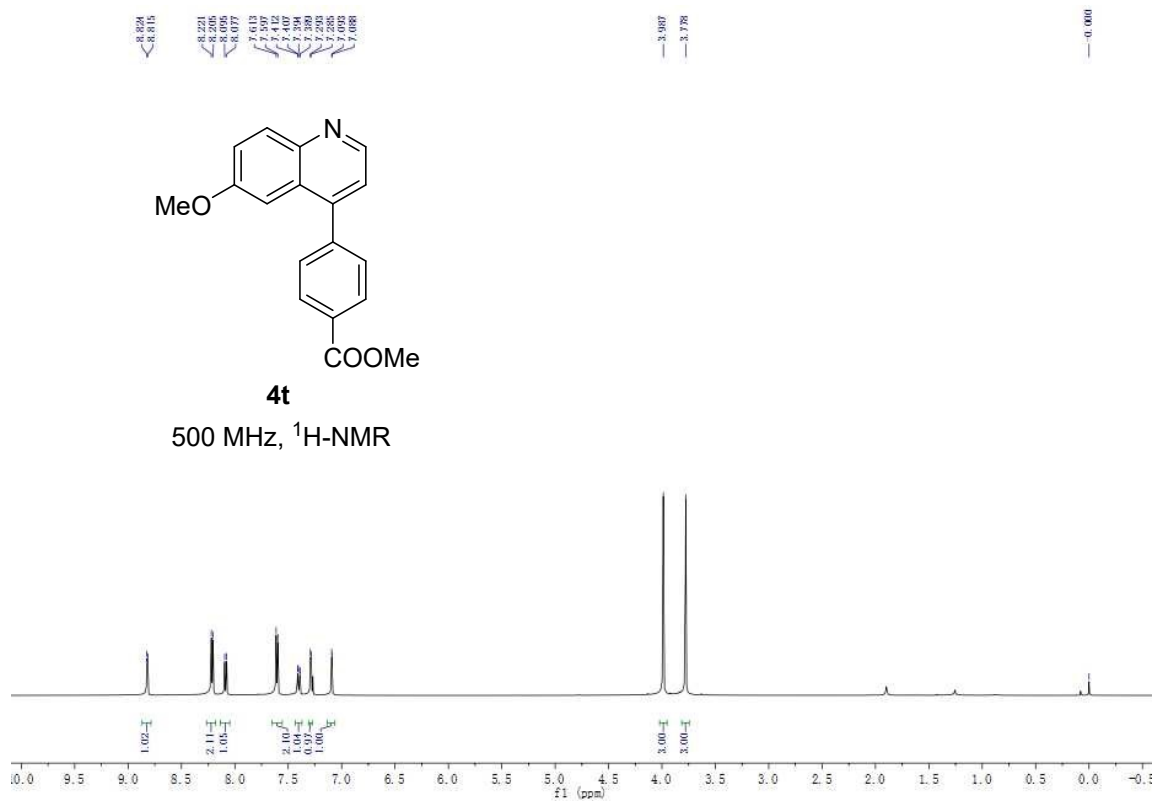

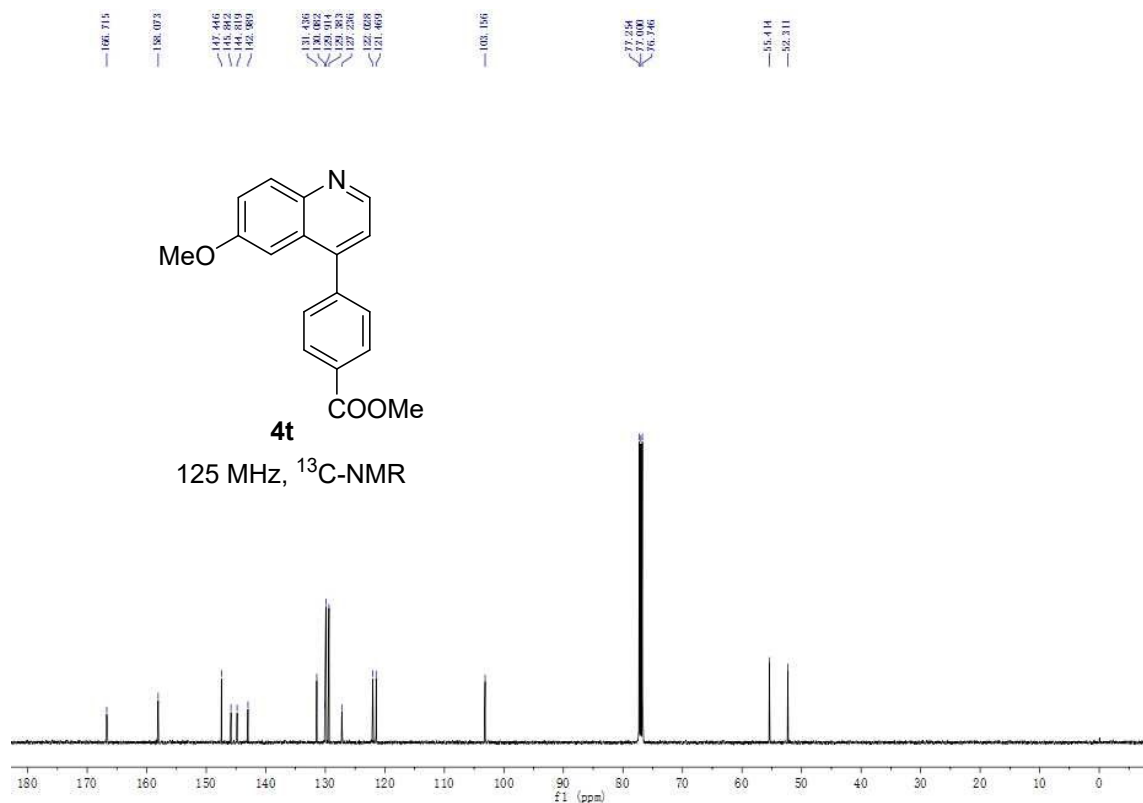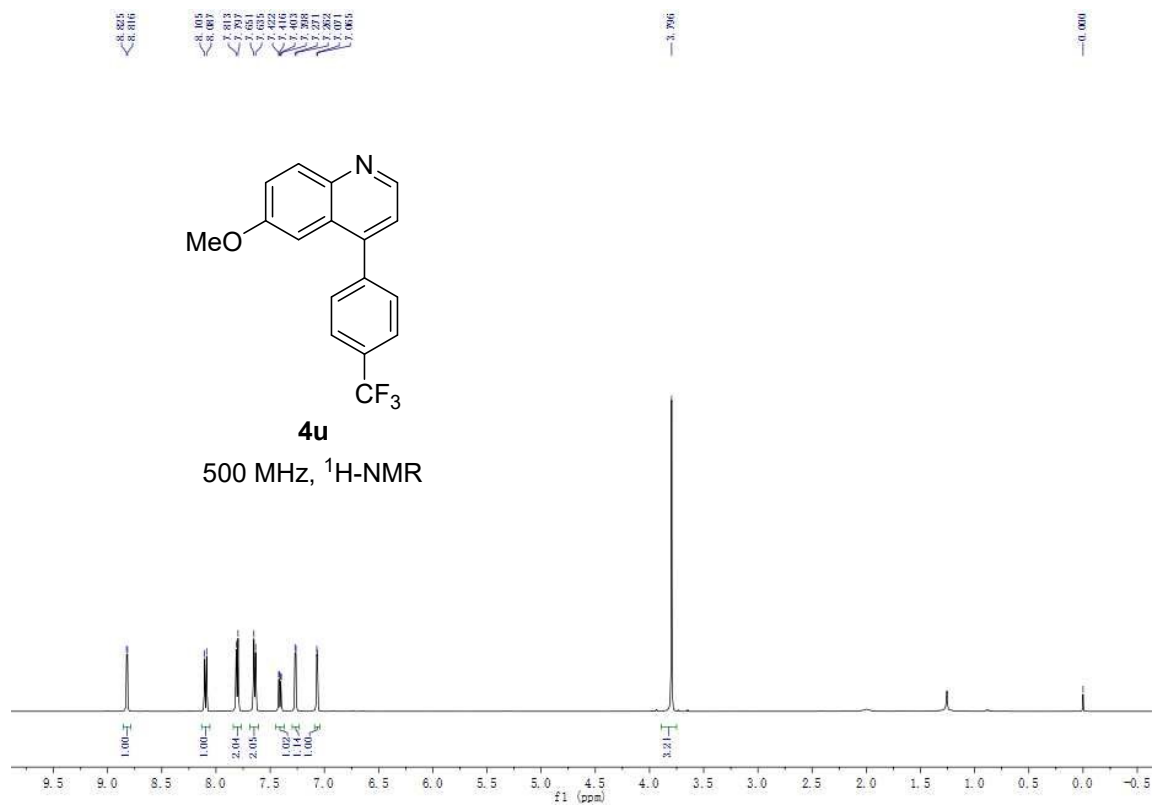

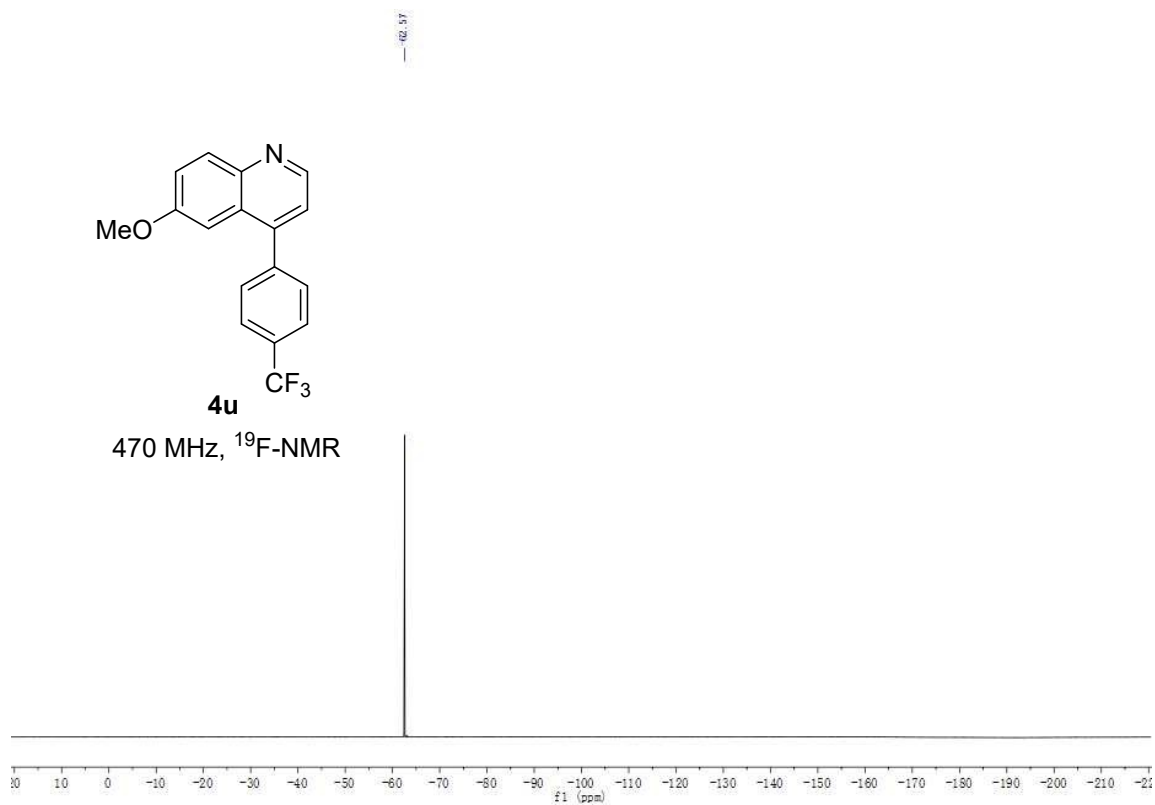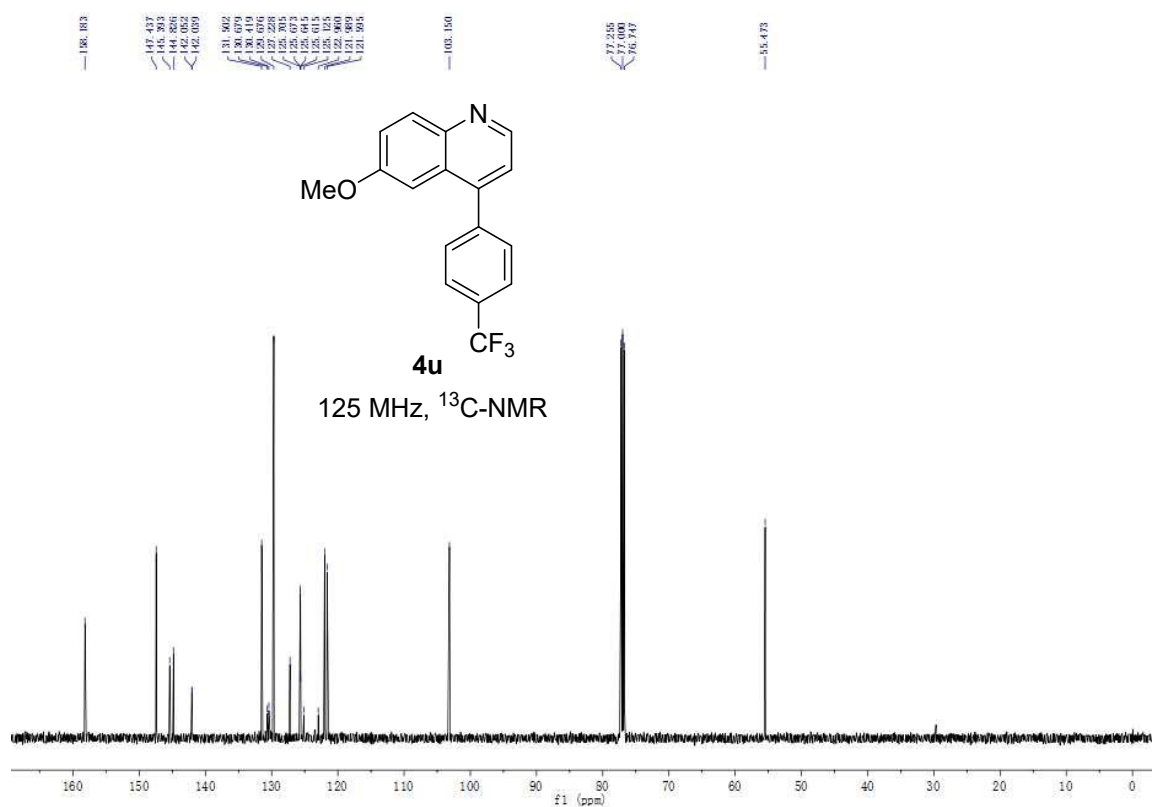

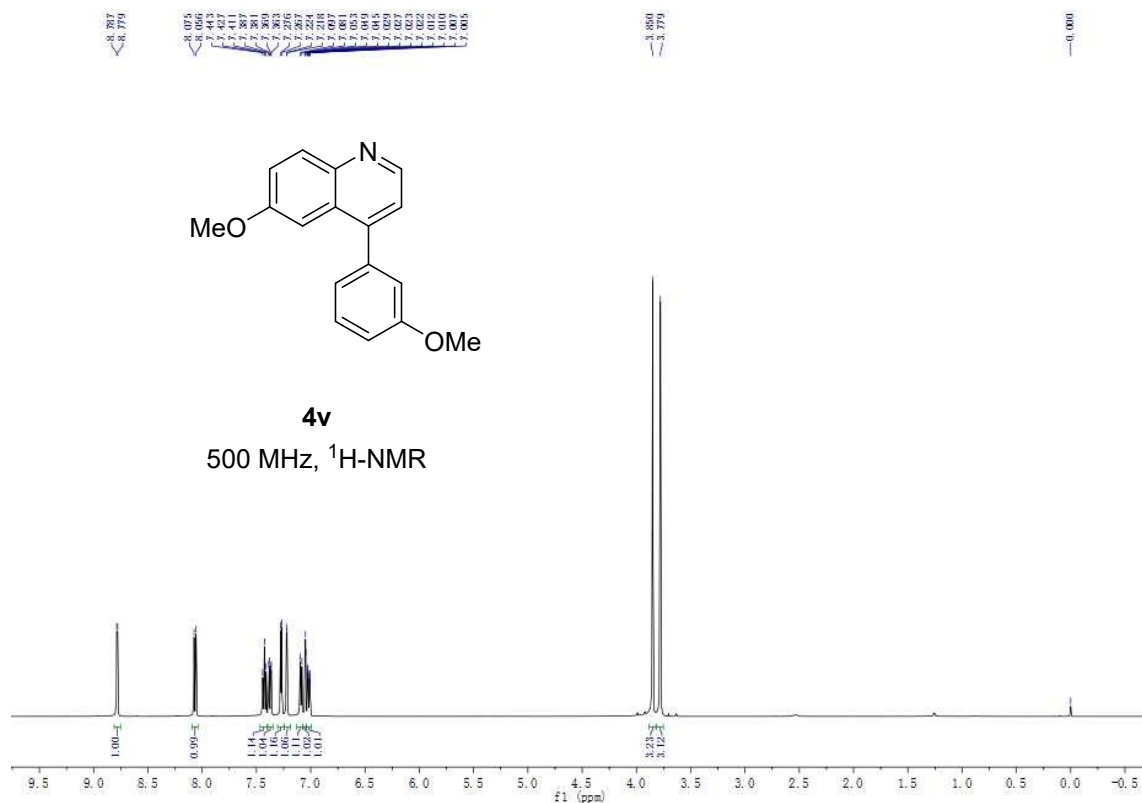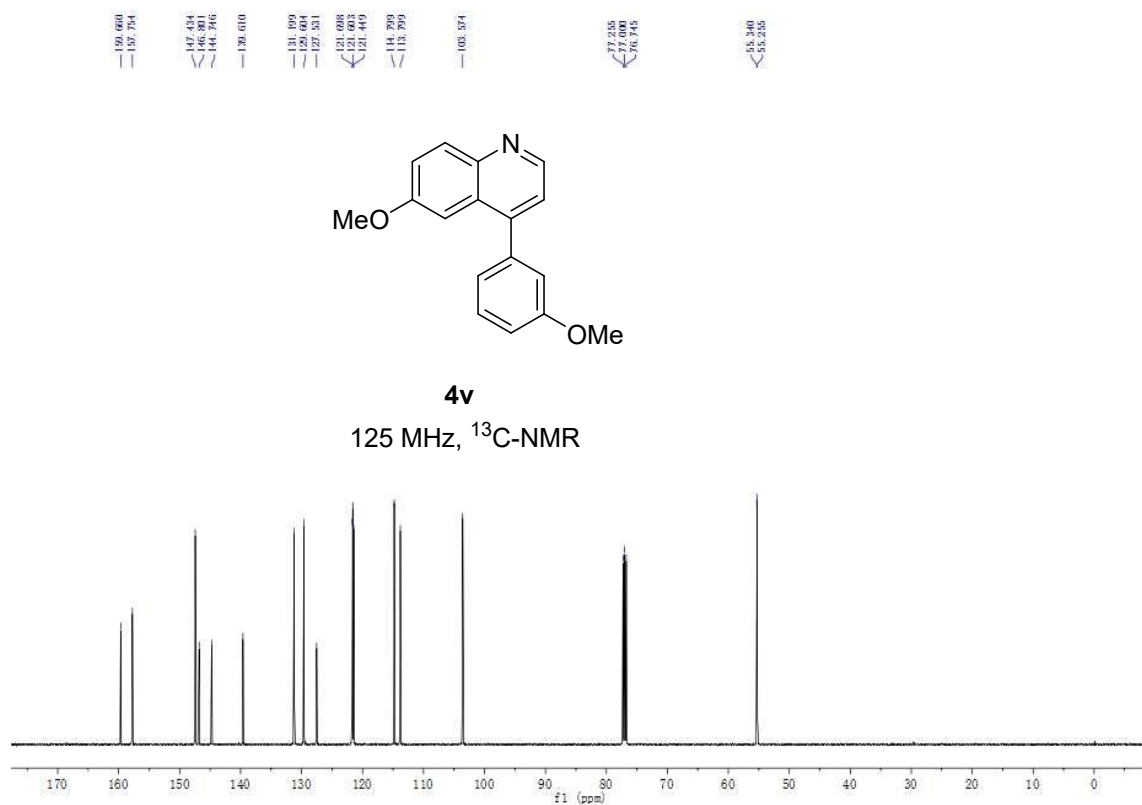

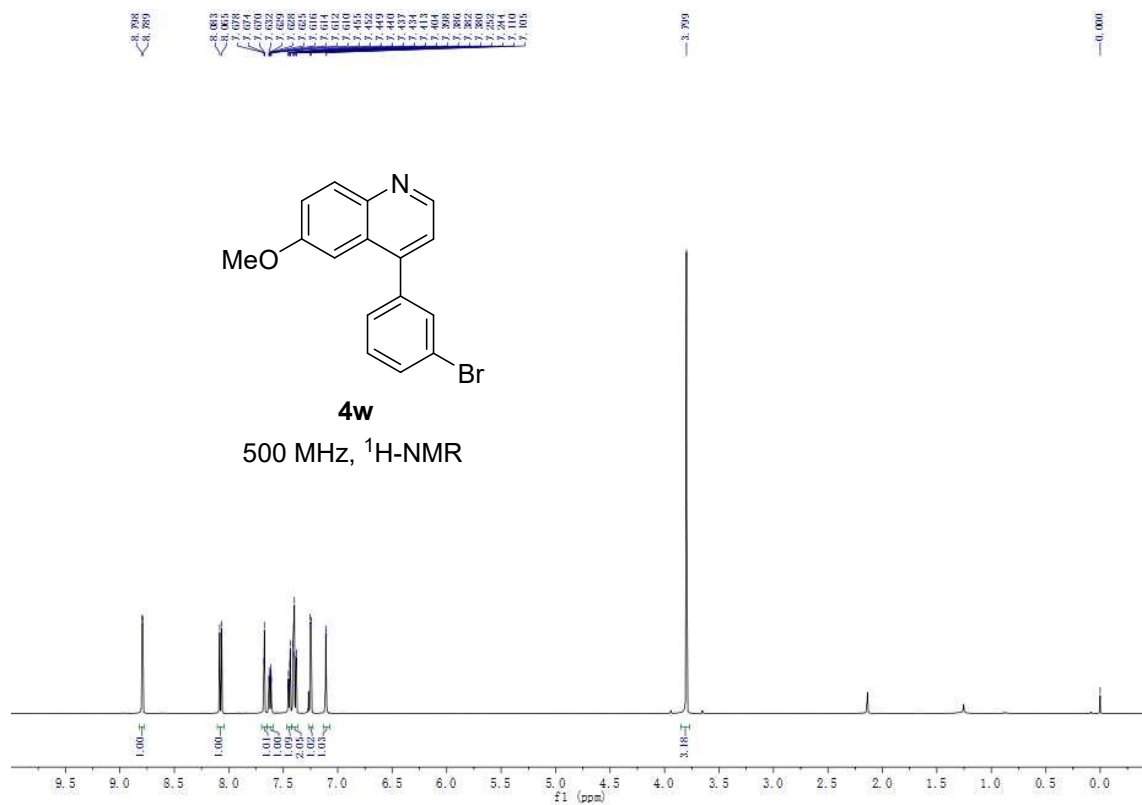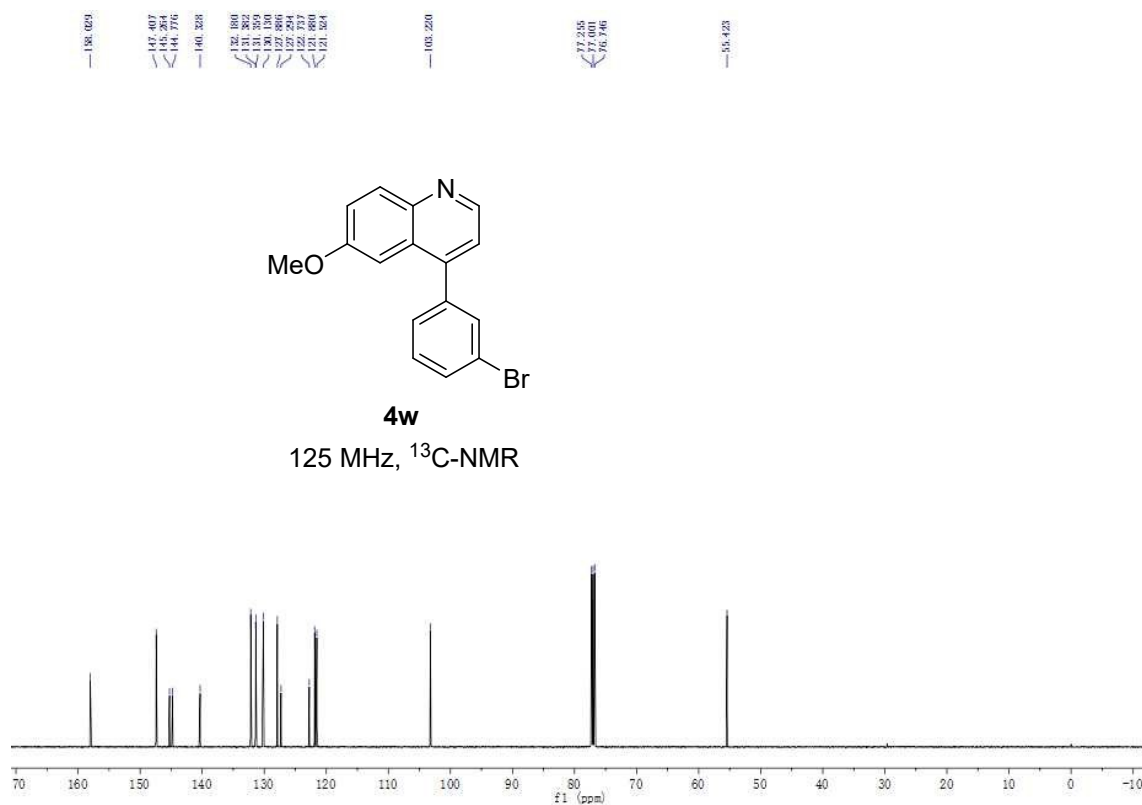







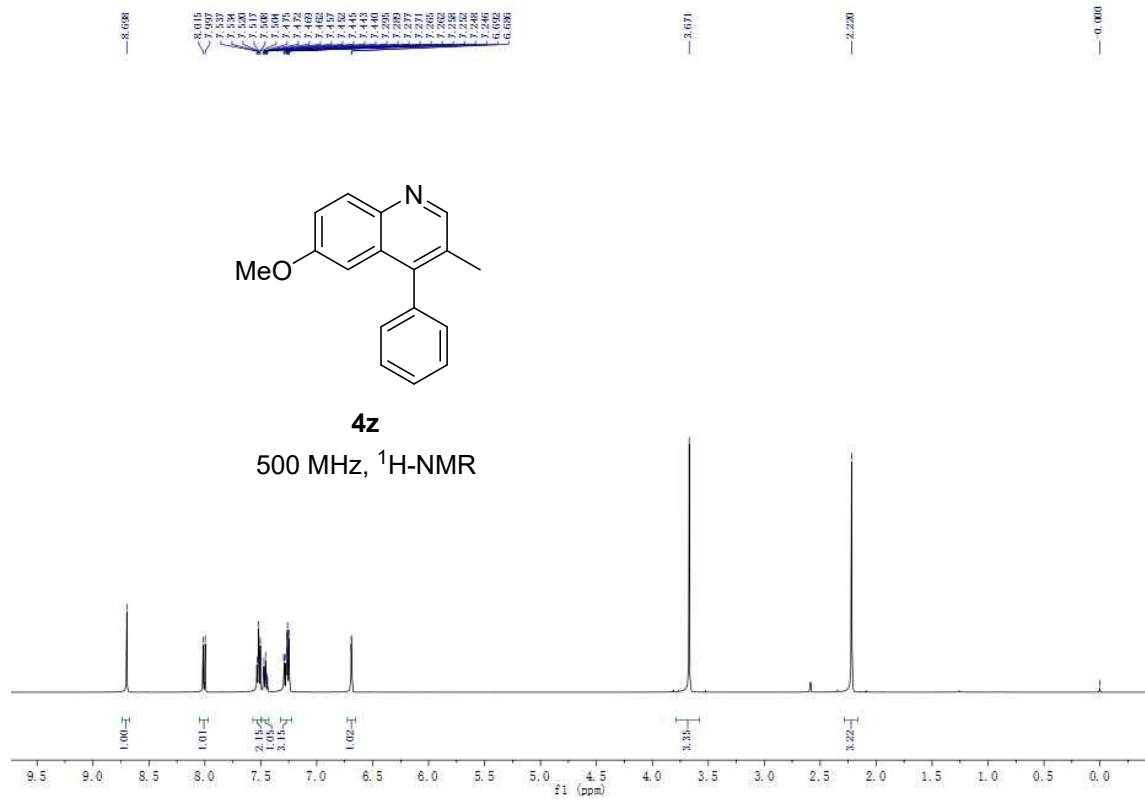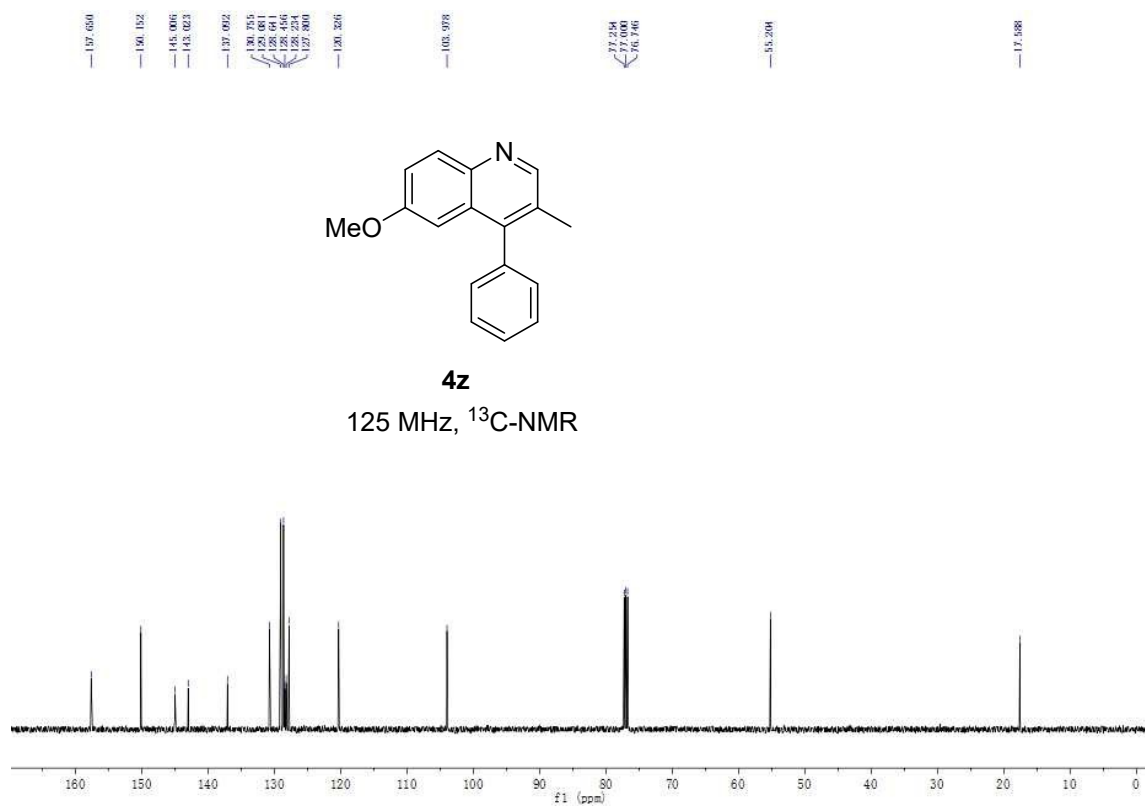

8.022  
7.945  
7.944  
7.944  
7.929  
7.929  
7.929  
7.912  
7.909  
7.909  
7.904  
7.899  
7.899  
7.885  
7.882  
7.879  
7.873  
7.873  
7.868  
7.860  
7.860  
7.844  
7.838  
7.838  
7.821  
7.156

3.772

3.022  
3.017  
2.992  
2.977

1.406  
1.395

0.000

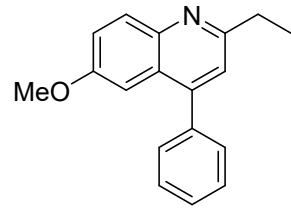

**4b**

500 MHz, <sup>1</sup>H-NMR

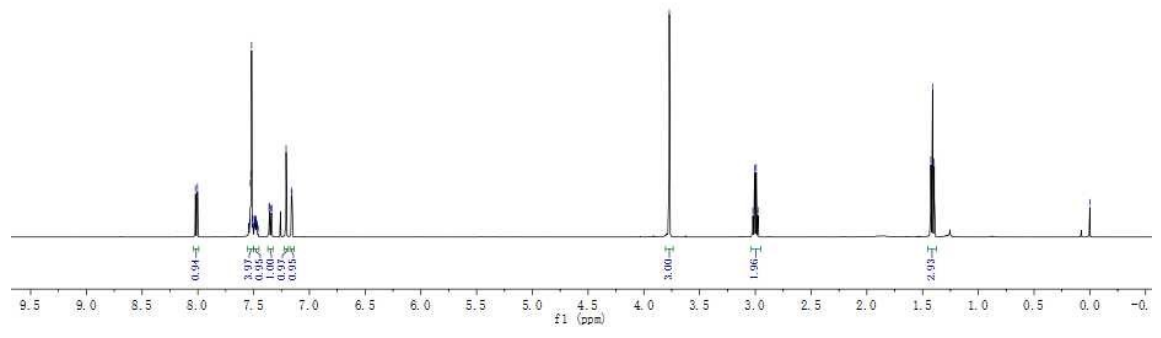

161.025  
157.261

147.407  
144.362

136.655  
130.612  
129.203  
128.584  
128.037  
121.337  
121.272

106.888

77.254  
77.000  
76.746

55.391

32.022

14.119

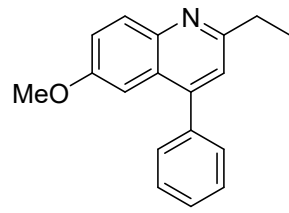

**4b**

125 MHz, <sup>13</sup>C-NMR

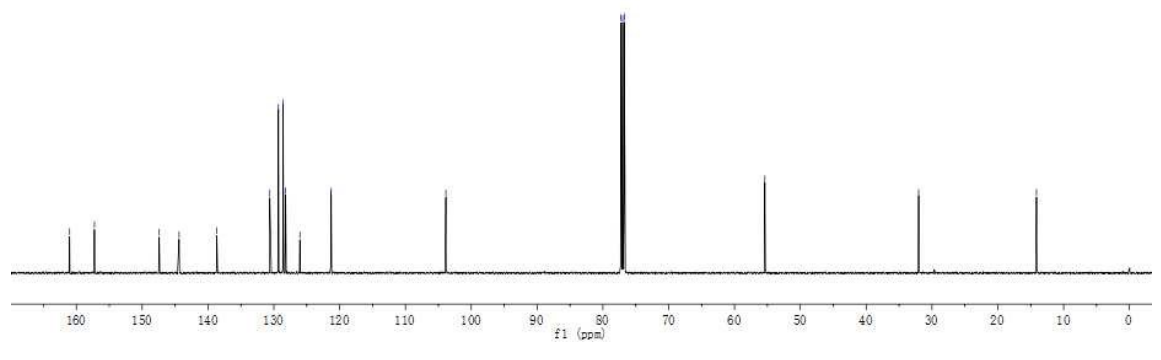

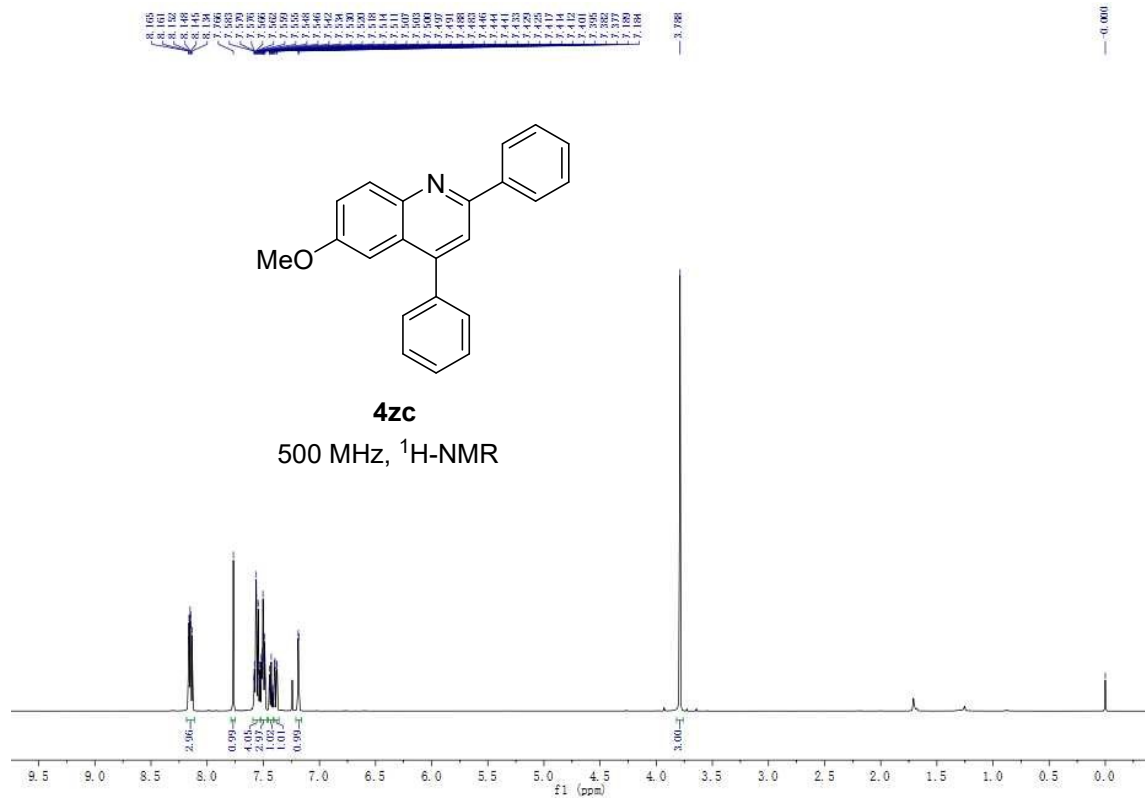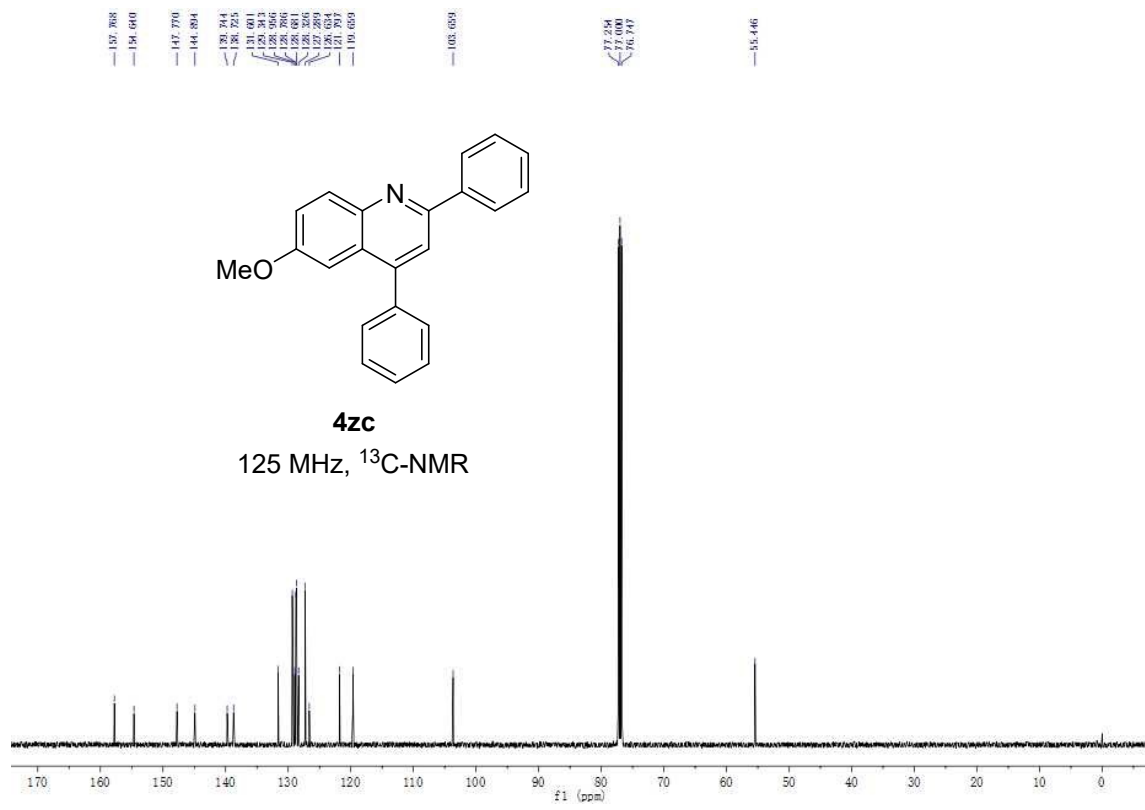

Supplement: d2nj04119g1.pdf [file d2nj04119g1.pdf]
